# Supplementary material for: Functional optic tract rewiring via subtype- and target-specific axonal regeneration and presynaptic activity enhancement
Source: Springer Nature journal article supplement (doi:10.1038/s41467-025-57445-x), 2025-03-04
Supplement: MOESM1 [file 41467_2025_57445_MOESM1_ESM.pdf]

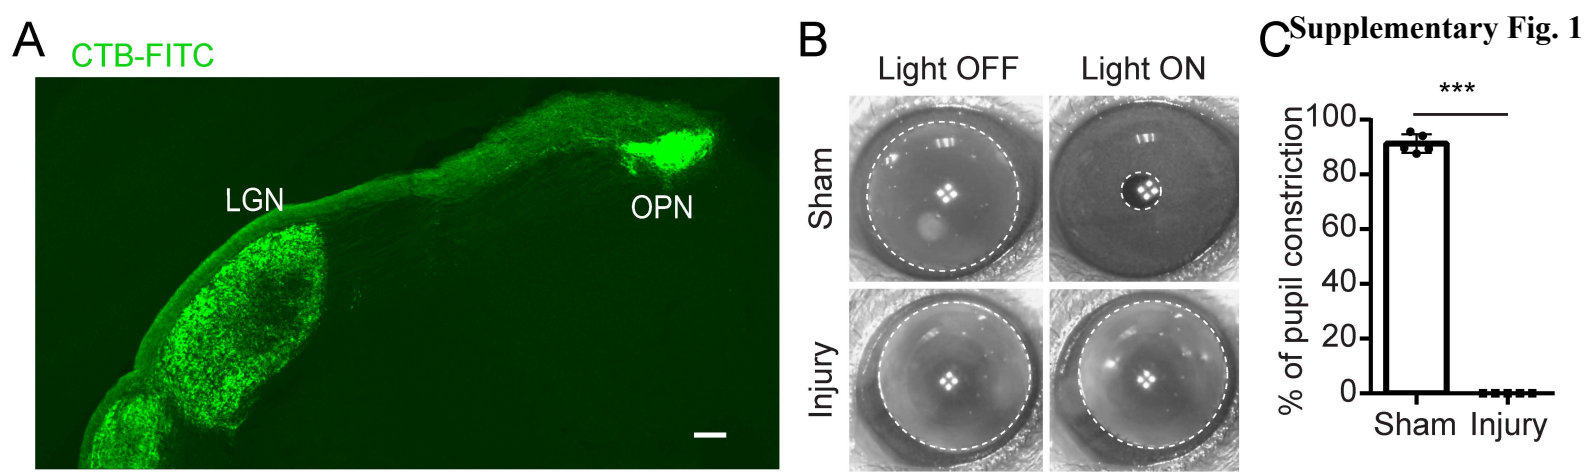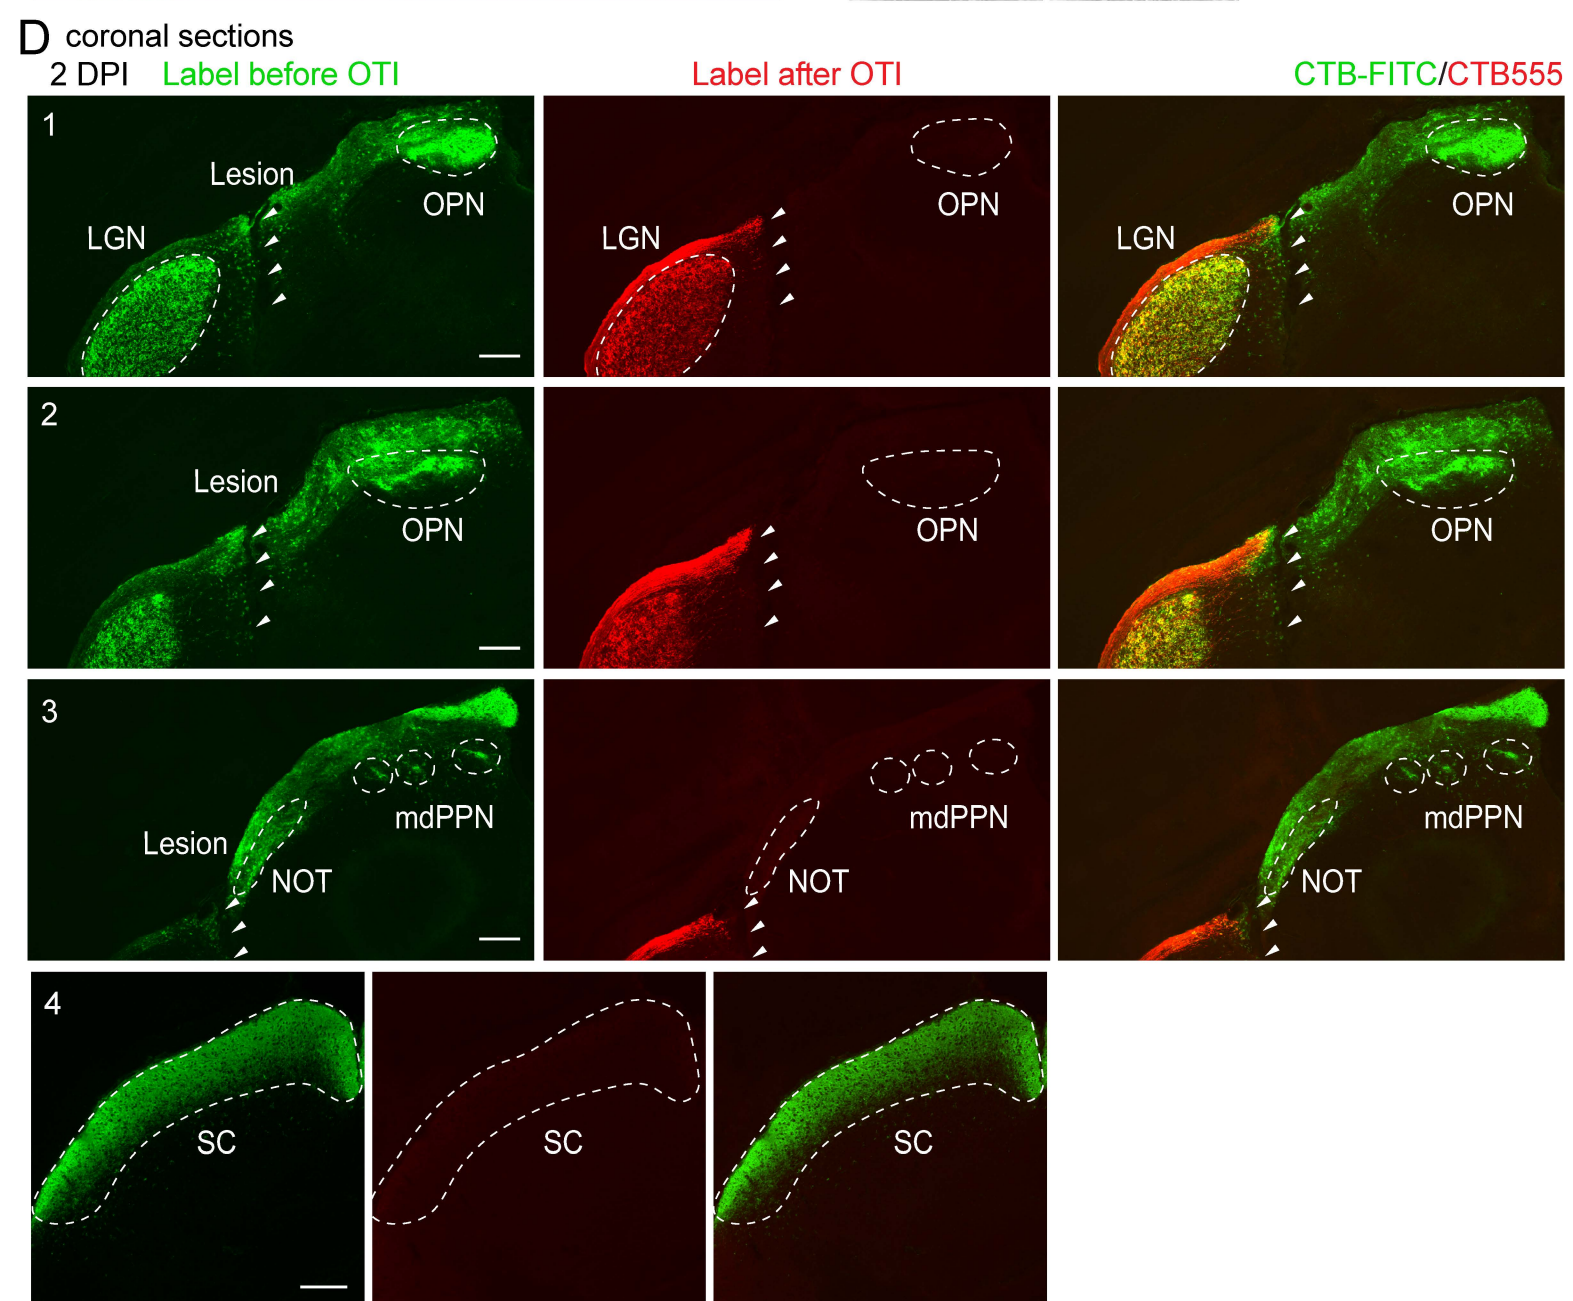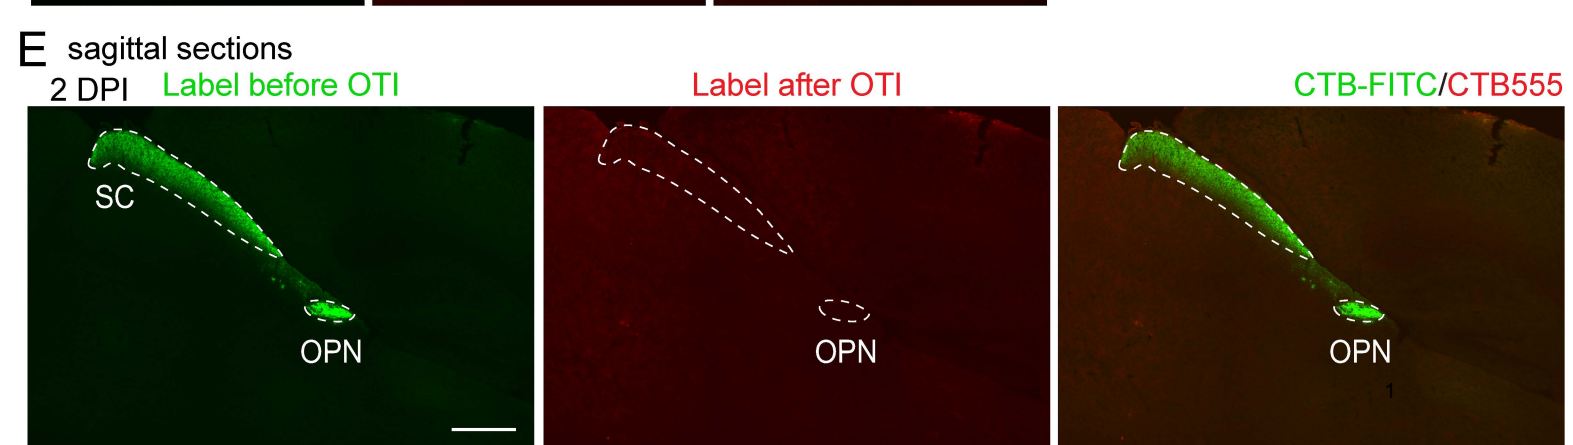

**Supplementary Fig. 1: Verification of the complete pre-OPN OTI.**

(A) Fluorescence images showing the labeling of the LGN and OPN regions through intravitreal injection of CTB-FITC (green) in intact mice. Scale bar: 200  $\mu\text{m}$ .

(B) Representative pupil images from sham and one-day pre-OPN OTI mice before and after 1-minute light ( $0.5 \text{ mW/cm}^2$ ) stimulation. The upper panel shows normal PLR (91%) in the sham mice, whereas the pre-OPN injured mice show no response.

(C) Quantification of PLR constriction following 1-minute light stimulation. Data presents mean  $\pm$  SEM.  $n=5$  mice. Statistical significance:  $p<0.0001$ , Student's t-test, two-sided.

(D-E) Fluorescence images of coronal (D) and sagittal (E) sections showing post-OTI CTB-555 (red) injection did not label RGC axons projecting beyond the lesion site, which was pre-labeled with CTB-FITC (green). All axons projecting beyond the LGN, including those targeting the OPN, NOT, mdPPN, and SC, were crushed. The arrowhead indicates the lesion site. Scale bar: 200  $\mu\text{m}$  (D), 500  $\mu\text{m}$  (E).

\*\*\*  $p\leq 0.001$

Source data are provided as a Source Data file.



A

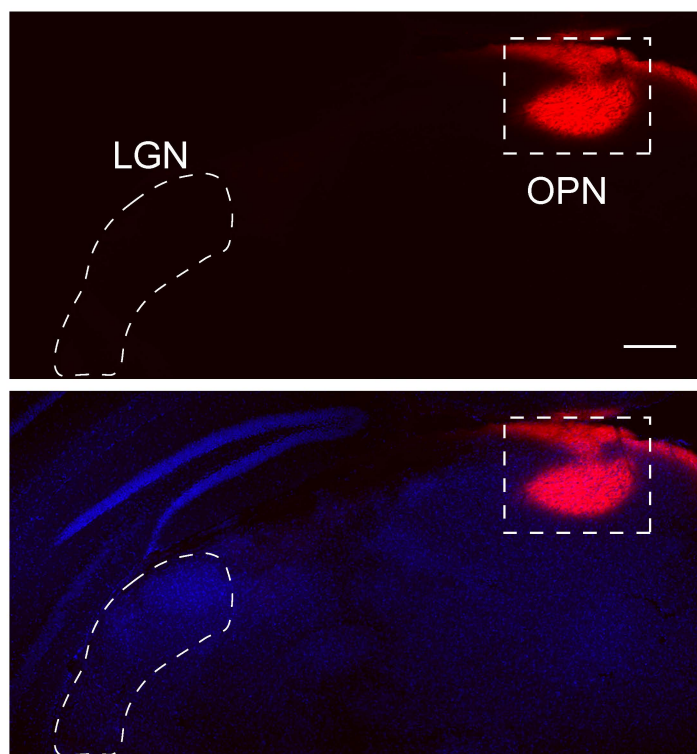

B

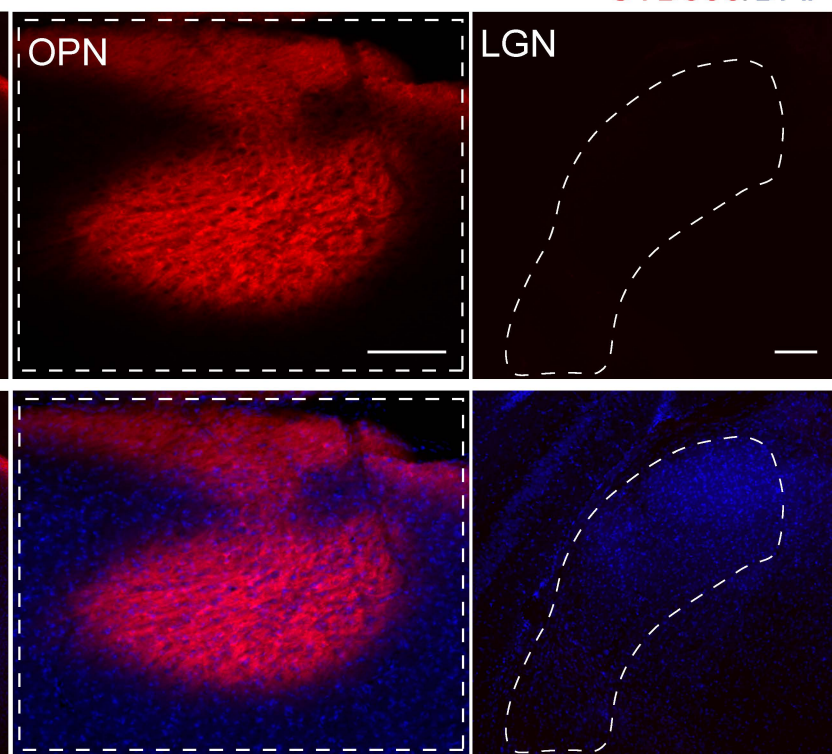

C

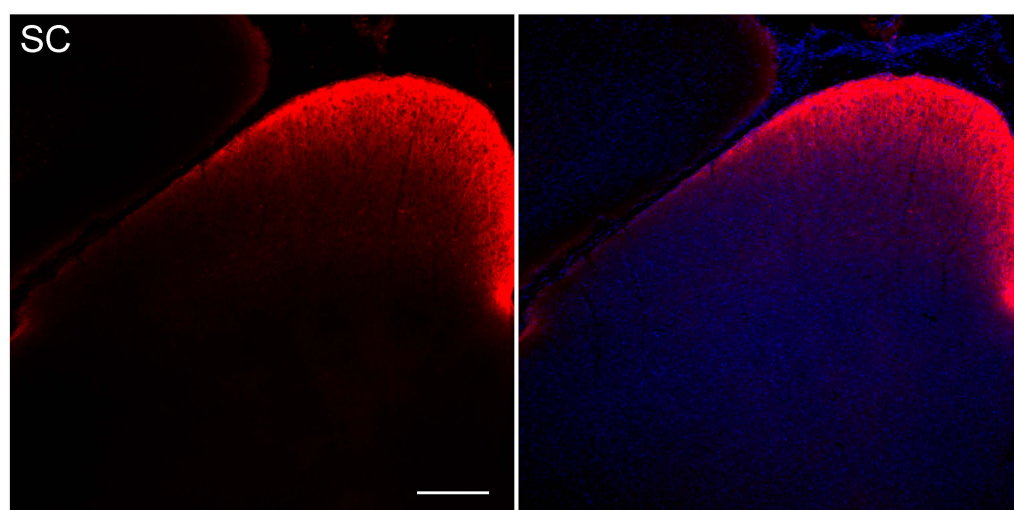

CTB555/DAPI

E

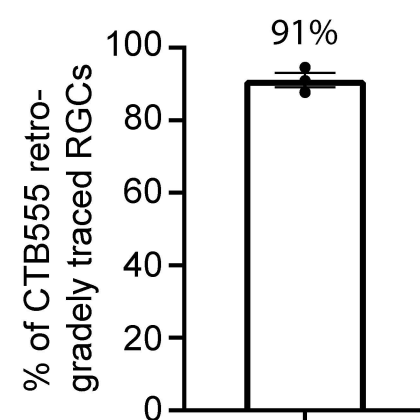

D

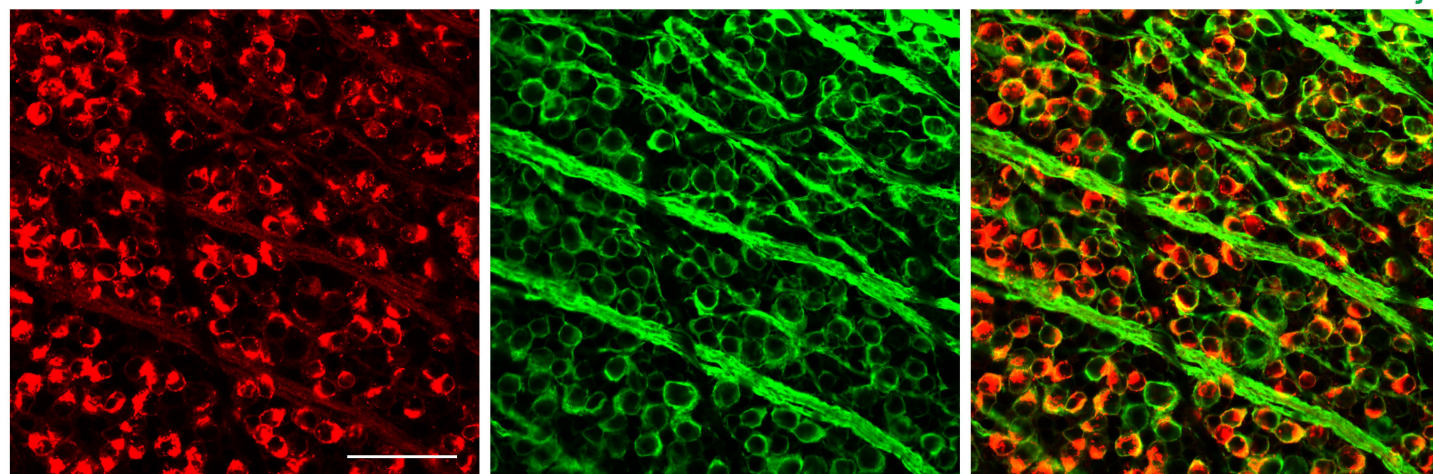

CTB555/Tuj1

**Supplementary Fig. 2: Retrograde labeling of RGCs that project beyond LGN.**

(A-C) Representative images showing the injection sites of the retrograde tracer CTB555 (red) (A, OPN; B, enlarged OPN; C, SC). Scale bar: (A) 200  $\mu\text{m}$ , (B) 100  $\mu\text{m}$ , (C) 200  $\mu\text{m}$ .

(D) Representative images of the flat-mounted retina showing the retrogradely labeled RGCs by CTB555 (red) co-localized with RGC marker Tuj1 (green). Scale bar: 50  $\mu\text{m}$ .

(E) Quantification of the percentage of the retrogradely labeled RGCs that project beyond LGN for (D). Data presents mean  $\pm$  SEM. n=3 mice.

Source data are provided as a Source Data file.



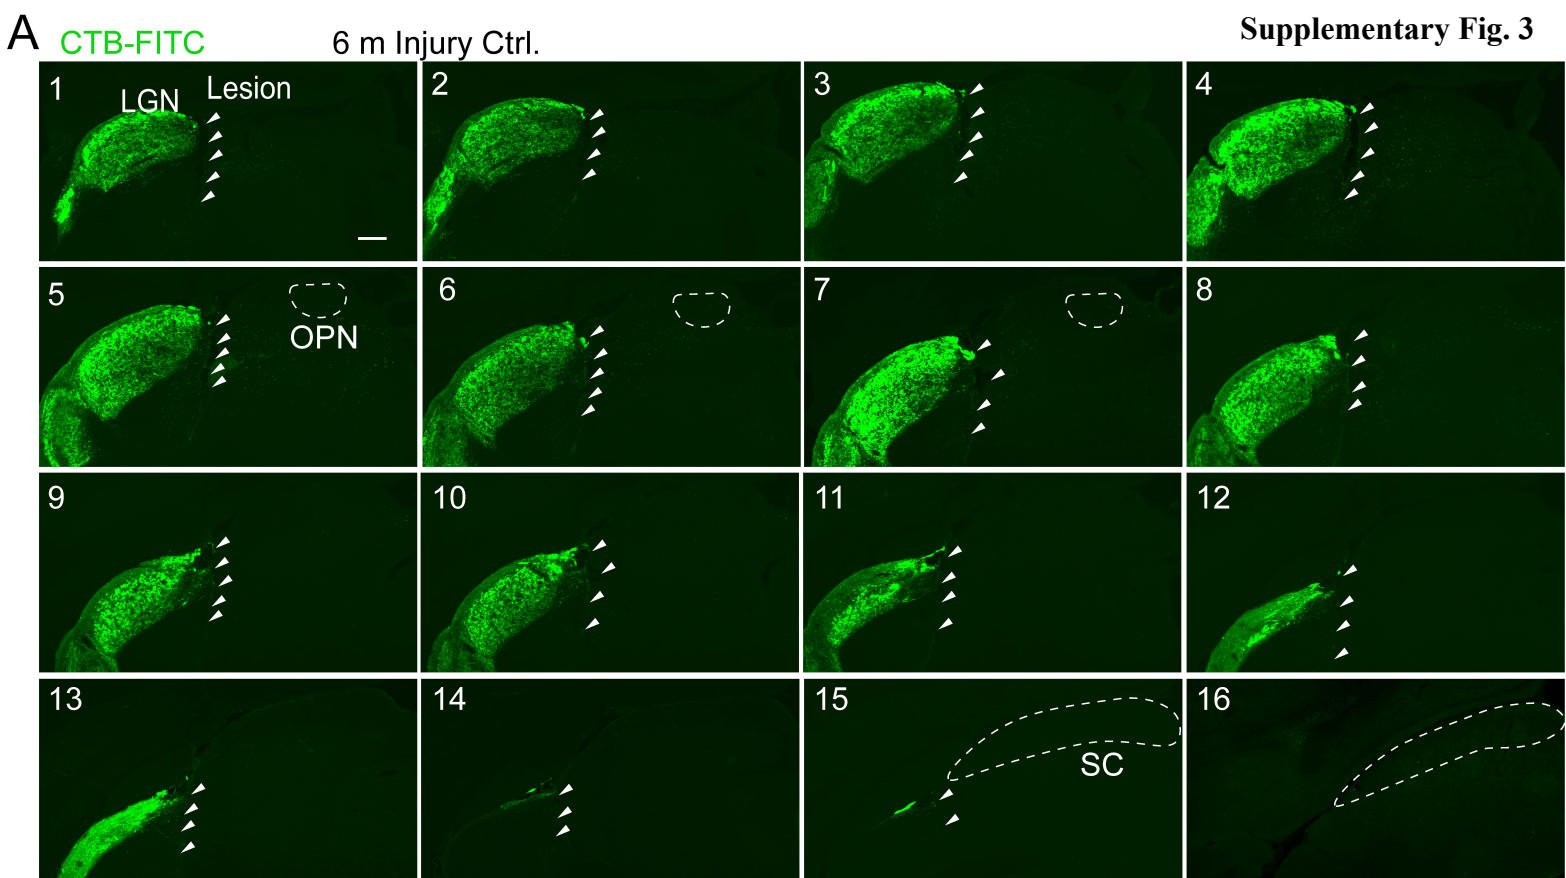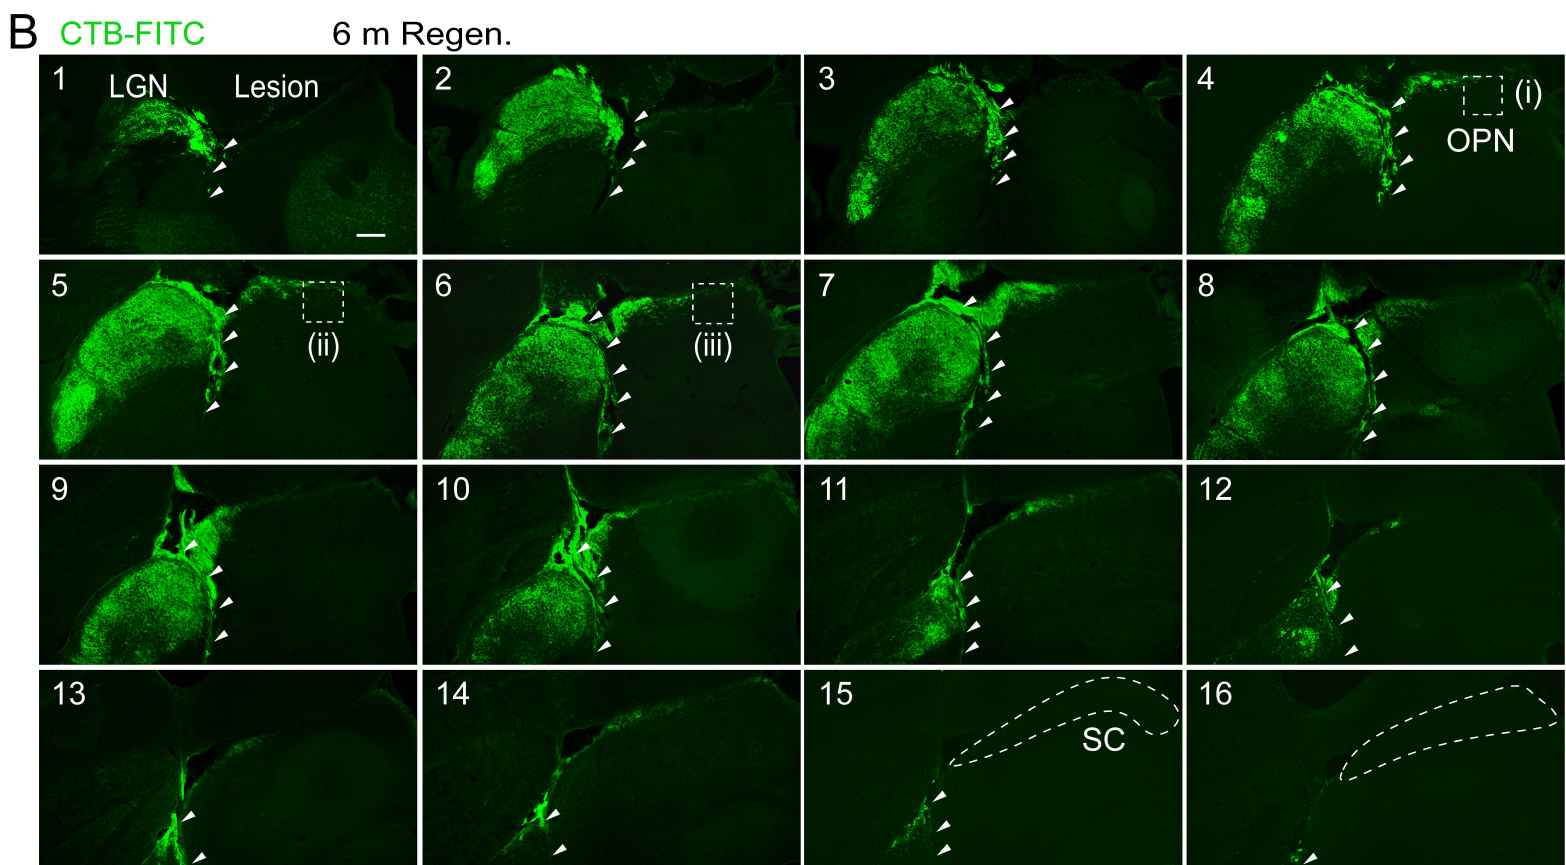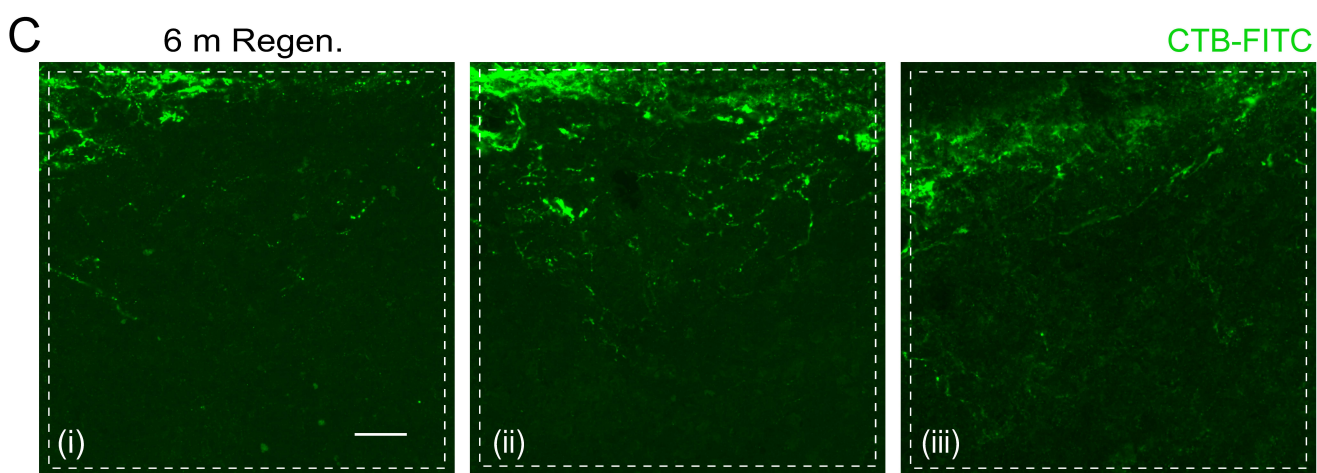



**Supplementary Fig. 3: Serial coronal sections in 6m Injury Ctrl. and Regen. mice.**

(A) Serial sections of anterior to posterior coronal images from 6m Injury Ctrl. mice injected with AAV2-LacZ showed no axons beyond the lesion site after 6 months of injury. The arrowhead indicates the lesion site. The dash lines outline the OPN regions (5-7) and SC regions (15-16) in Injury Ctrl mouse. Scale bar: 200  $\mu$ m.

(B) Serial sections of anterior to posterior coronal images from Pten/Socs3 knockout mice displayed regenerated axons passing across the lesion site and growing into OPN after 6 months of injury. The OPN regions (4-6) and SC regions (15-16) in 6 m Regen. mouse are outlined by dash lines. Scale bar: 200  $\mu$ m.

(C) Zoomed-in images of rectangles-indicated areas in (B) showing regenerated RGC axons in the OPN regions (i-iii, B4-6). Scale bar: 50  $\mu$ m.

A

Sham

PV/CTB-FITC

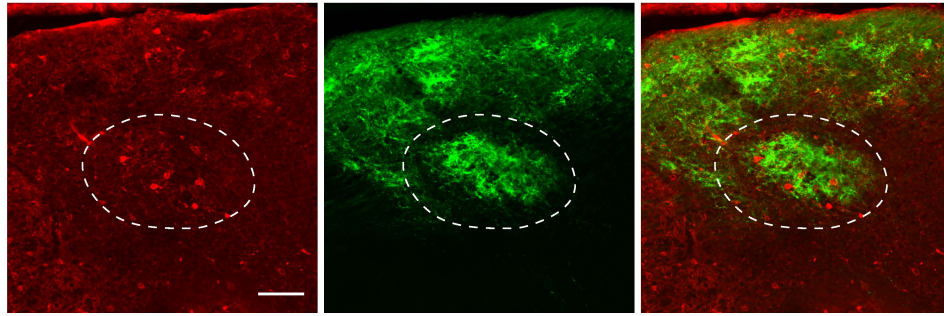

6 m Regen.

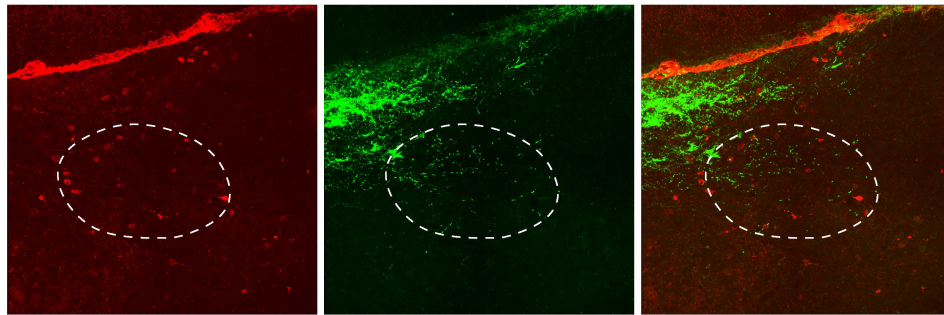

B

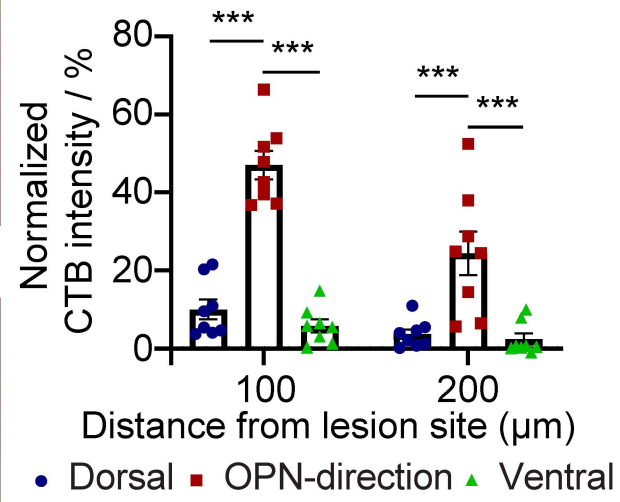

C

6 months Regen.

CTB-FITC

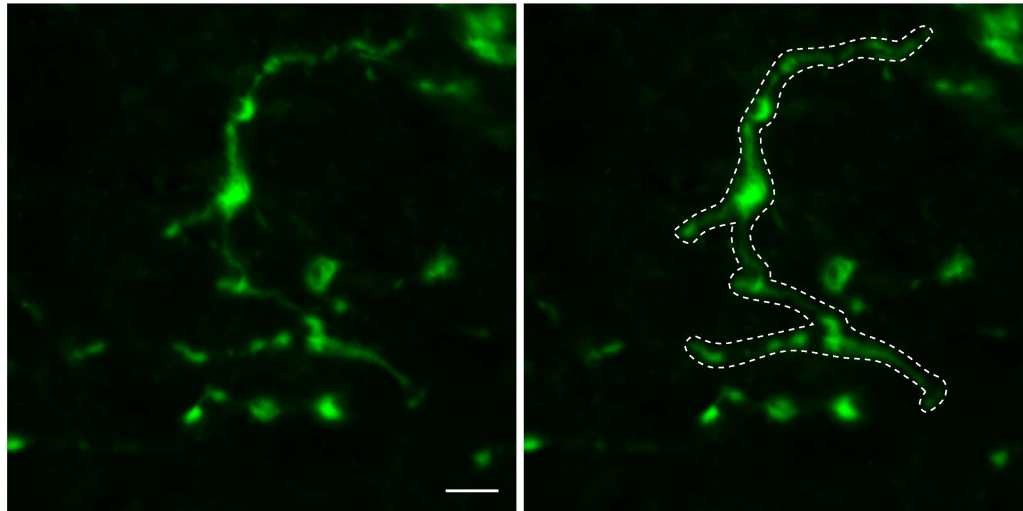

D

Sham

CTB-FITC

6 m Regen.

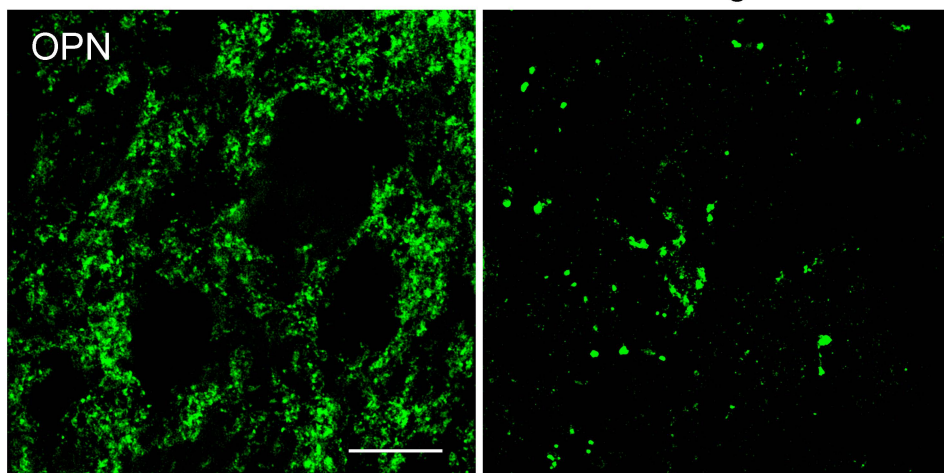

E

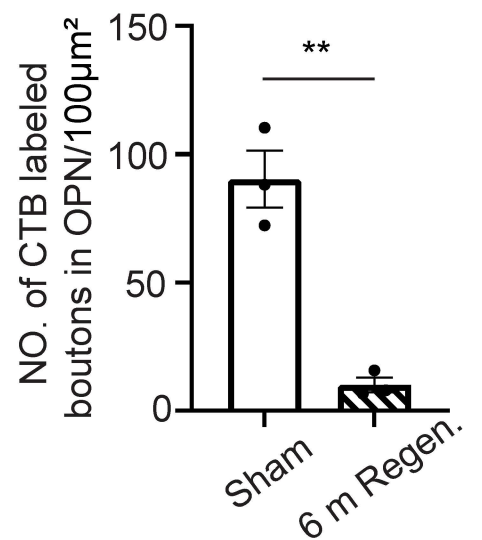

**Supplementary Fig. 4: Parvalbumin staining to delineate the OPN region and the characteristics of the regenerated axons.**

(A) Representative images of parvalbumin (PV) staining (red) in brain sections illustrating the OPN from Sham and 6 m Regen. group. The shown brain regions were contralateral to the CTB-FITC (green) injected eye. Scale bar: 100  $\mu$ m.

(B) Quantification of the percentage of regenerating axons that grew dorsally, ventrally, or along the original trajectory toward the OPN was conducted using normalized CTB intensity in animals from the 6 m Regen. group. Data presents mean  $\pm$  SEM. n=8 mice. Statistical significance: 100  $\mu$ m:  $p < 0.0001$  (Dorsal vs. OPN-direction, and OPN-direction vs. Ventral), 200  $\mu$ m:  $p < 0.0001$  (Dorsal vs. OPN-direction, and OPN-direction vs. Ventral), ANOVA followed by Bonferroni test, two-sided.

(C) One example of CTB-labeled regenerated axons (green) beyond the lesion site includes collaterals. The right panel outlines the regenerated axons with a dashed line. Scale bar: 5  $\mu$ m.

(D) Representative images show the CTB-labeled axon terminal boutons (green) within the OPN from Sham and 6 m Regen. mice. Scale bar: 10  $\mu$ m.

(E) Quantification of the density of CTB-labeled axon terminal boutons in the OPN for both Sham and 6 m Regen. mice. Data presents mean  $\pm$  SEM. n=3 mice. Statistical significance:  $p = 0.0021$ , Student's t-test, two-sided.

\*\*  $p \leq 0.01$ , \*\*\*  $p \leq 0.001$

Source data are provided as a Source Data file.



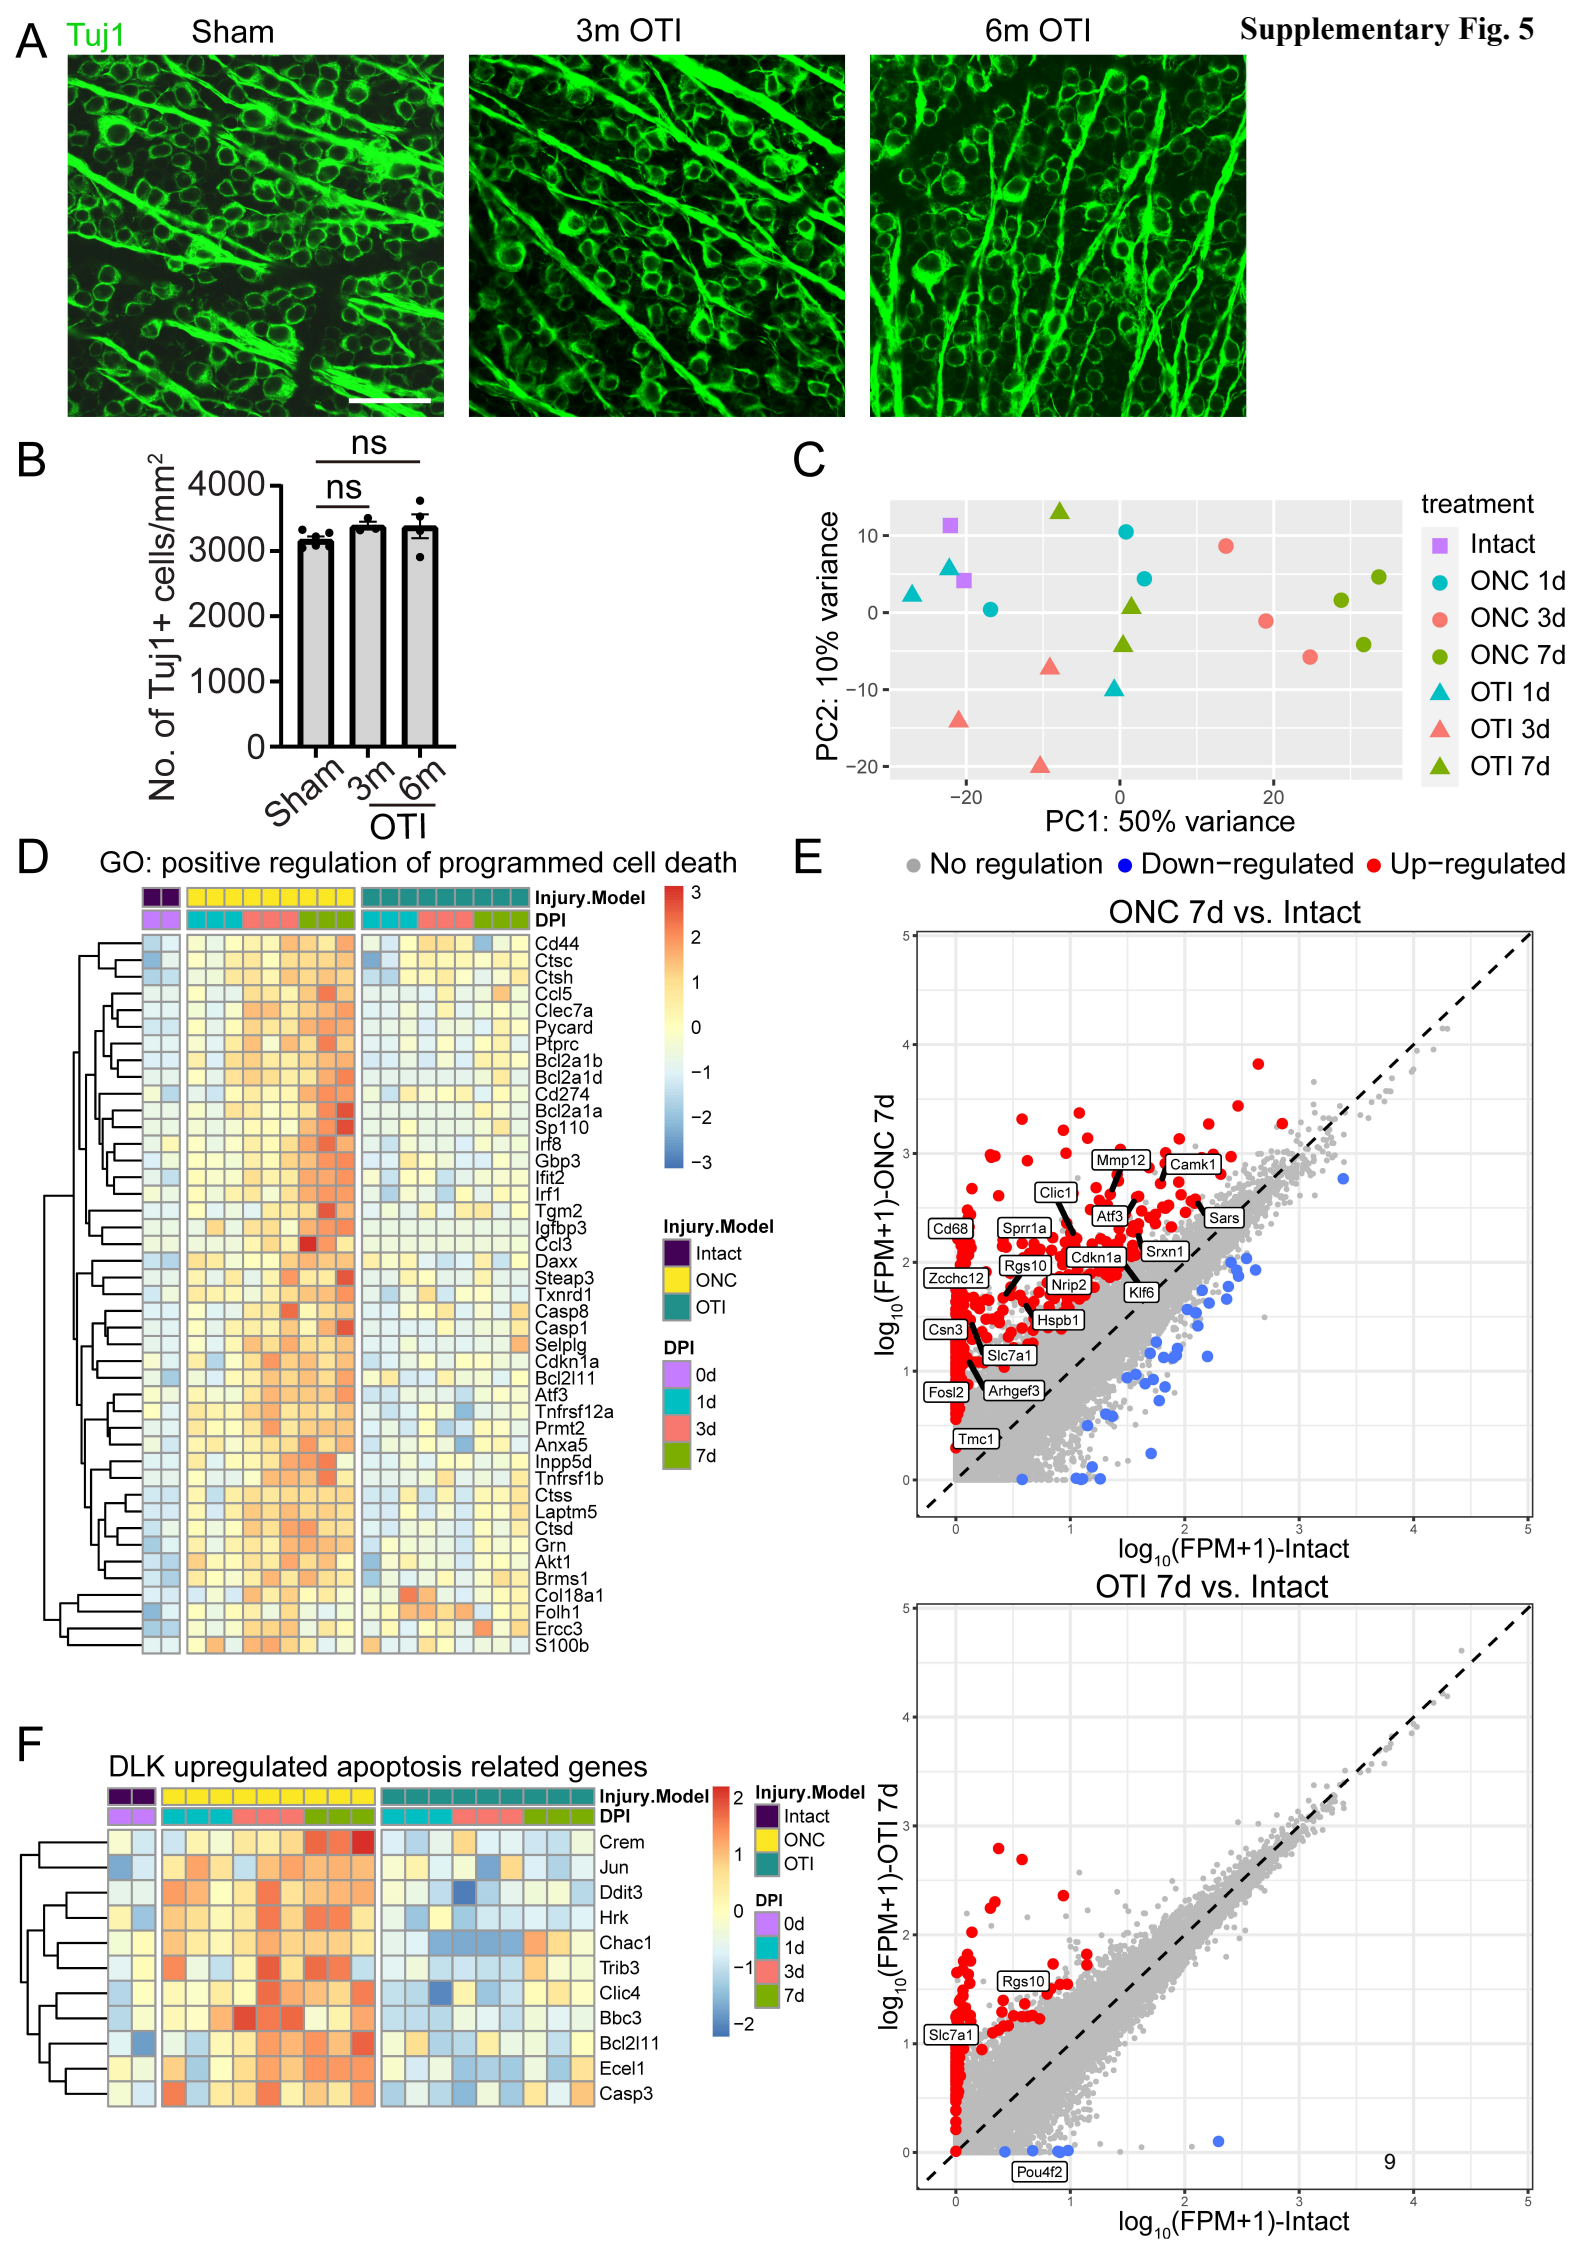

**Supplementary Fig. 5: RGC survived the pre-OPN OTI and identification of cell death-related pathways via bulk RNA sequencing.**

(A) Representative images of Tuj1 staining (green) in whole-mount retinas from sham mice, as well as from 3 months and 6 months pre-OPN OTI mice. Scale bar: 50  $\mu$ m.

(B) Quantification of the number of surviving RGCs. Data presents mean  $\pm$  SEM. n=6 (Sham), n=3 (3 m OTI), and n=4 (6 m OTI). Statistical significance: p=0.3345 (sham vs. 3 m OTI), 0.3084 (sham vs. 6 m OTI), ANOVA followed by Dunnett test, two-sided.

(C) PCA plot of bulk RNAseq experiment showing the separation of optic tract injury (OTI) and optic nerve crush (ONC) groups.

(D) Heatmap showing the expression of genes from “GO: positive regulation of programmed cell death” between the OTI model and ONC model from the bulk RNAseq data.

(E) Scatterplot showing the differences in terms of differentially expressed genes (red/blue dot labeled) and specifically DLK-dependent genes (text labeled) between different injury models.

(F) Heatmap showing the expression of DLK upregulated apoptosis-related genes between the OTI model and ONC model from the bulk RNAseq data. These genes show obvious activation in the ONC model but not in the OTI model.

ns, not significant  $p > 0.05$

Source data are provided as a Source Data file.

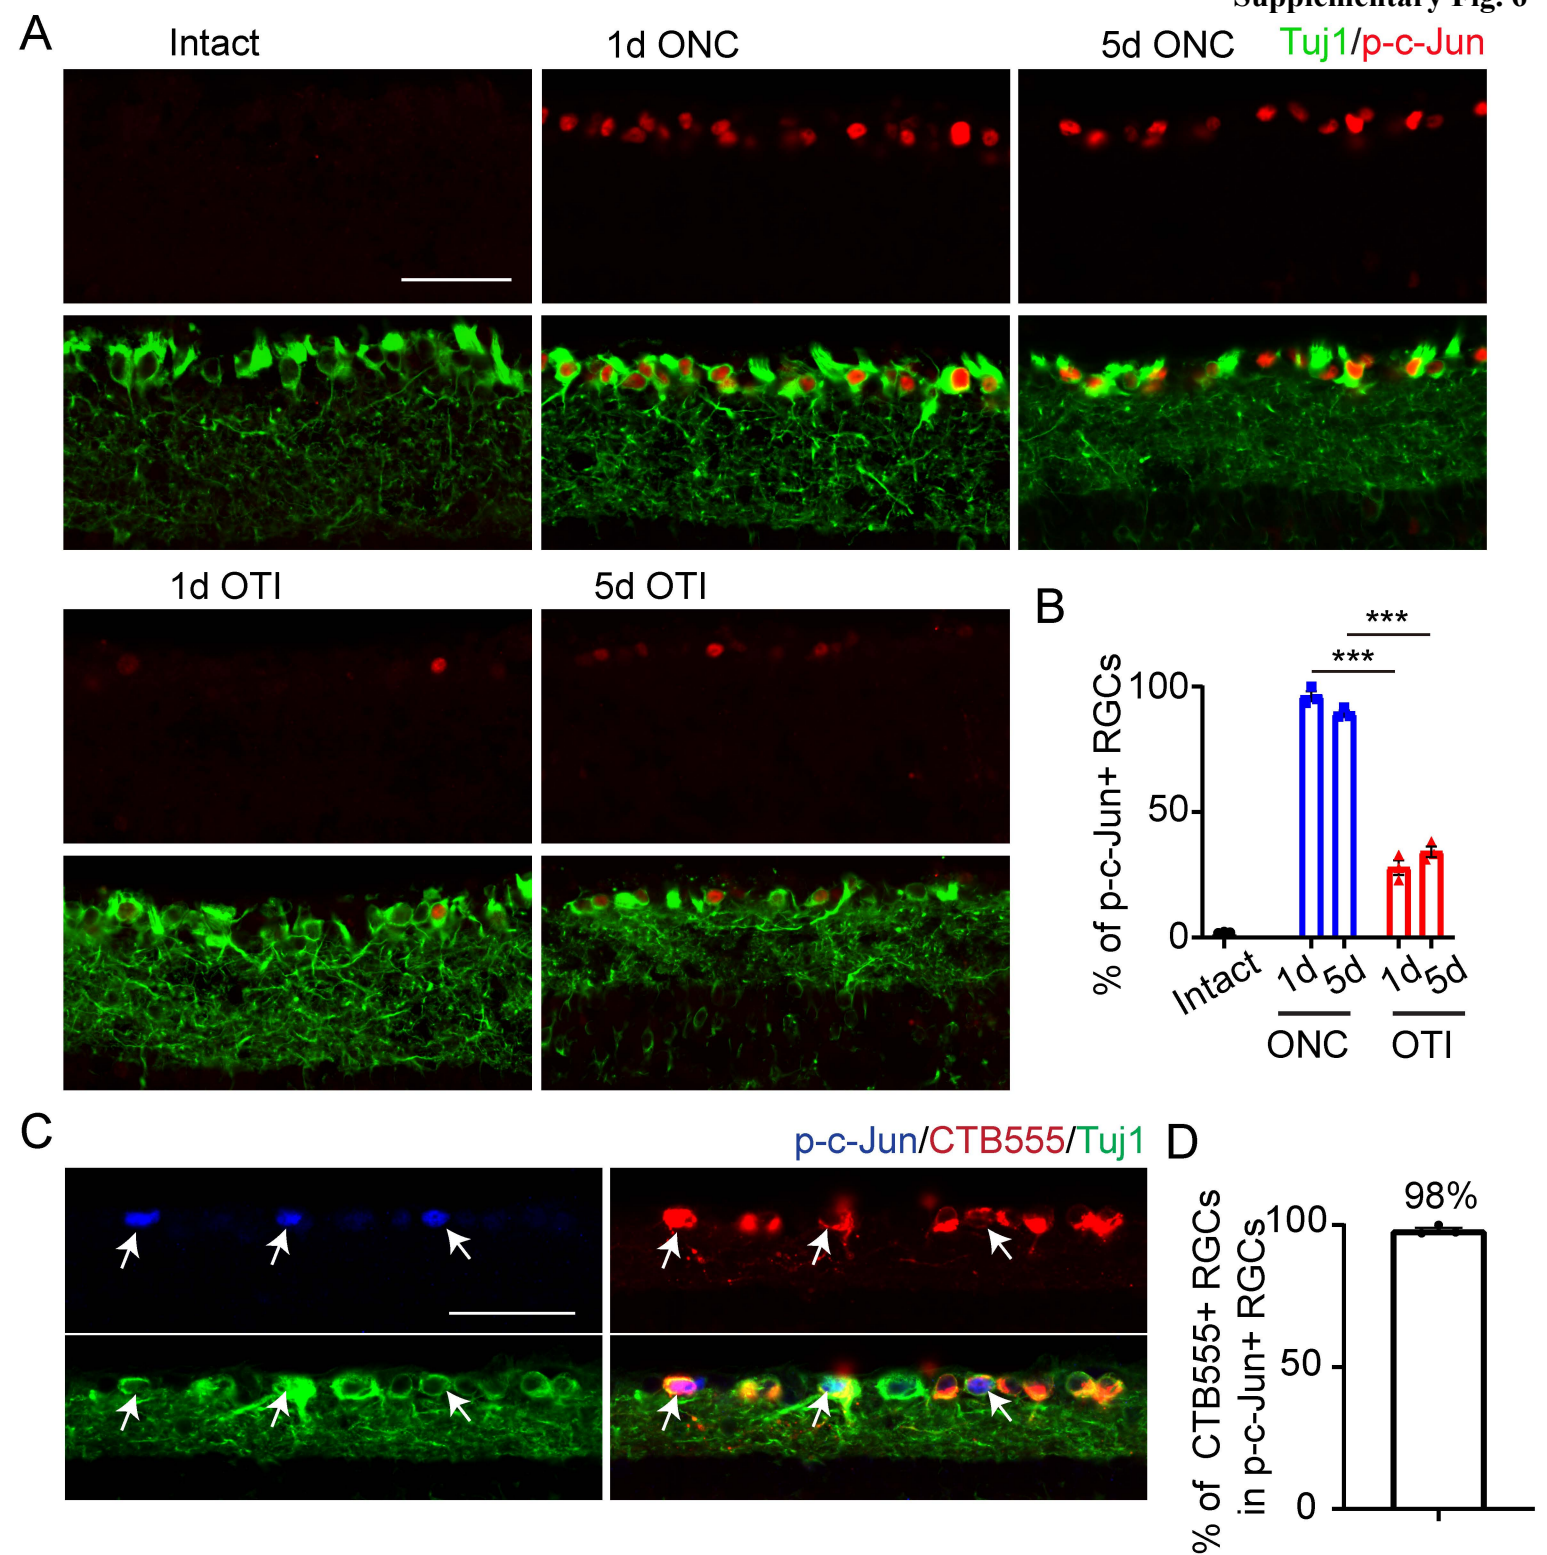



**Supplementary Fig. 6: OTI induces lower DLK activation and p-c-Jun expression is upregulated in RGCs that were injured by the OTI.**

(A) Representative images of Tuj1(green) and p-c-Jun (red) double staining in sectioned retinas to show the DLK-pathway activation status at different times after ONC and OTI. Scale bar: 50  $\mu$ m.

(B) Quantification of the percentage of p-c-Jun<sup>+</sup> RGCs across intact, ONC, and OTI groups. Data presents mean  $\pm$  SEM. n=3 mice. Statistical significance:  $p < 0.0001$ , ANOVA followed by Tukey's test, two-sided.

(C) Representative images illustrate the colocalization of p-c-Jun (blue) and OTI-affected RGCs labeled by CTB555 (red) in mice at 5 days post-OTI. Tuj1 staining (green) highlights all RGCs. White arrows indicate OTI-activated p-c-Jun<sup>+</sup> RGCs that co-localize with CTB555<sup>+</sup> RGCs. Scale bar: 50  $\mu$ m.

(D) Quantification of the percentage of CTB555<sup>+</sup> RGCs among p-c-Jun<sup>+</sup> RGCs. Data are presented as mean  $\pm$  SEM. n = 3 mice.

\*\*\*  $p \leq 0.001$

Source data are provided as a Source Data file.

**A** CTB/Bassoon/Homer1 Sham

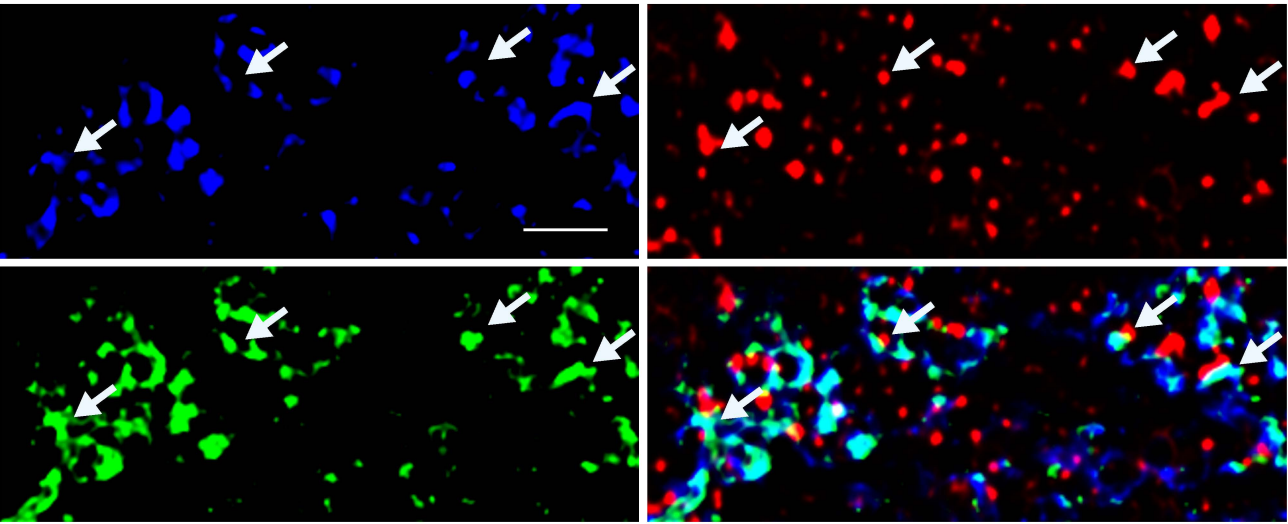

**B** CTB/Bassoon/Homer1 6 m Injury Ctrl.

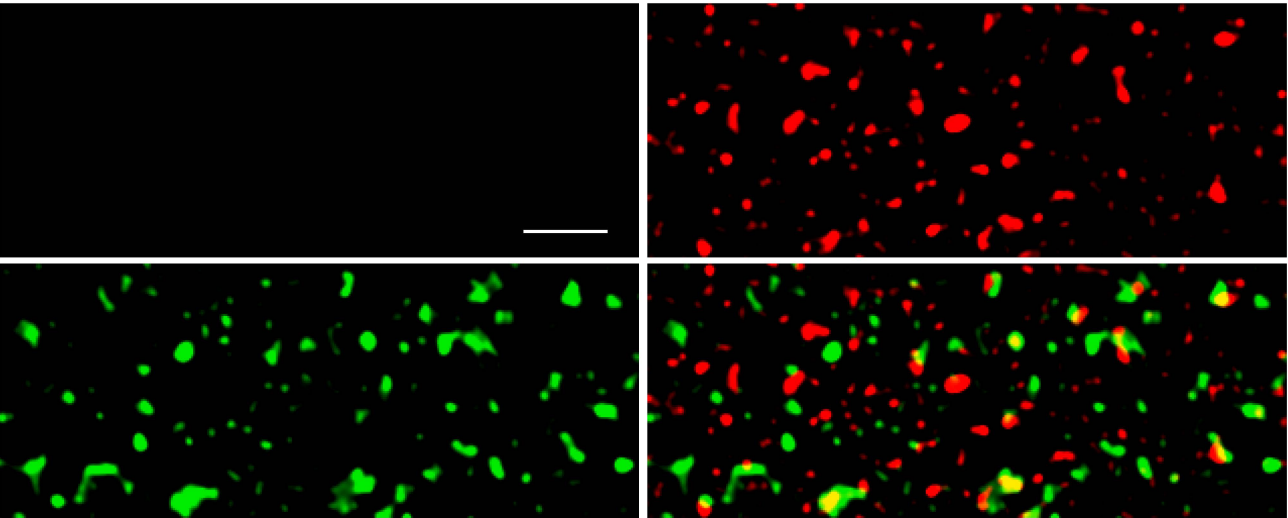

**Supplementary Fig. 7: Examination of anatomical synapses in OPN from the Sham and 6 m Injury Ctrl. mice.**

(A) Representative images showing CTB-labeled axon terminals (blue) were colocalized with Bassoon (green) and adjacent to Homer1 (red) in the OPN of Sham mice. Arrows pinpoint synapses in OPN. Scale bar: 2  $\mu$ m.

(B) Representative images showing the absence of CTB-labeled synapses in the OPN region of Injury Ctrl. mice 6 months after pre-OPN OTI. Scale bar: 2  $\mu$ m.



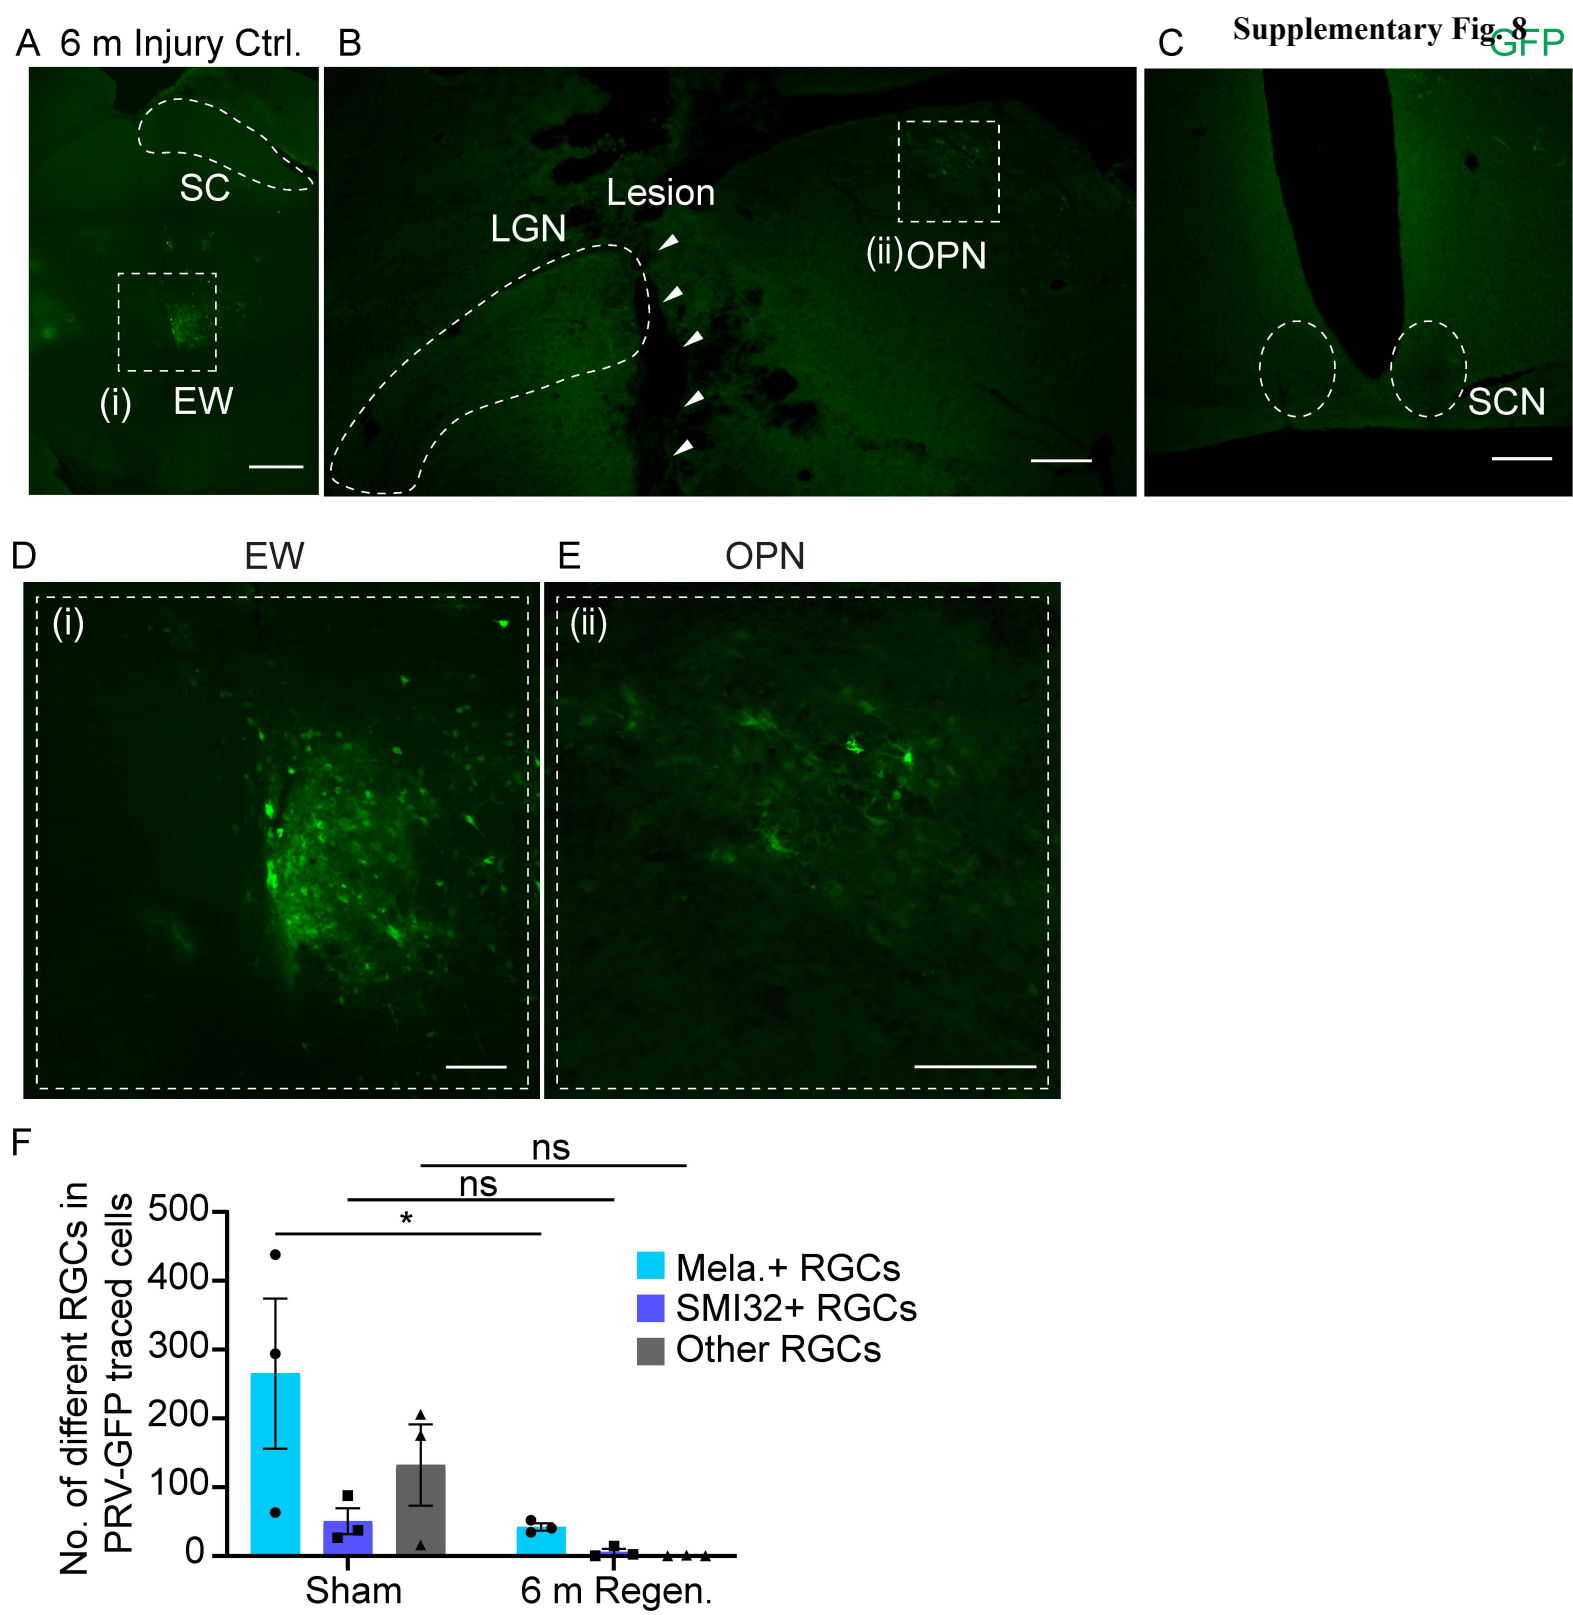

**Supplementary Fig. 8: PRV-labeled brain regions in 6 m Injury Ctrl. mice and the number of different types of RGC in PRV-GFP traced cells.**

(A-C) Representative images showing PRV-GFP retrogradely traced brain nuclei in the major RGC projection regions of the Injury Ctrl. mice, outlined with dashed lines. These regions include the SC (A), EW (A), OPN (B), LGN (B), and SCN (C). White arrowheads indicate the lesion site in (B). Scale bars: (A) 500  $\mu\text{m}$ , (B) 200  $\mu\text{m}$ , (C) 200  $\mu\text{m}$ .

(D-E) Representative zoomed-in images showing PRV-GFP-labeled cells in the EW (i, D) and OPN (ii, E). Scale bars: (D) 100  $\mu\text{m}$ , (E) 100  $\mu\text{m}$ .

(F) Quantification of the number of PRV-GFP-traced melanopsin<sup>+</sup> ipRGCs, SMI32<sup>+</sup>  $\alpha$ RGCs, and other RGC types. Data presents mean  $\pm$  SEM. n=3 mice. Statistical significance: p=0.029 (Mela. + RGCs), p>0.999 (SMI32<sup>+</sup> RGCs), p=0.2834 (Other RGCs). ANOVA followed by Bonferroni test, two-sided.

ns, not significant p>0.05, \* p $\leq$ 0.05

Source data are provided as a Source Data file.

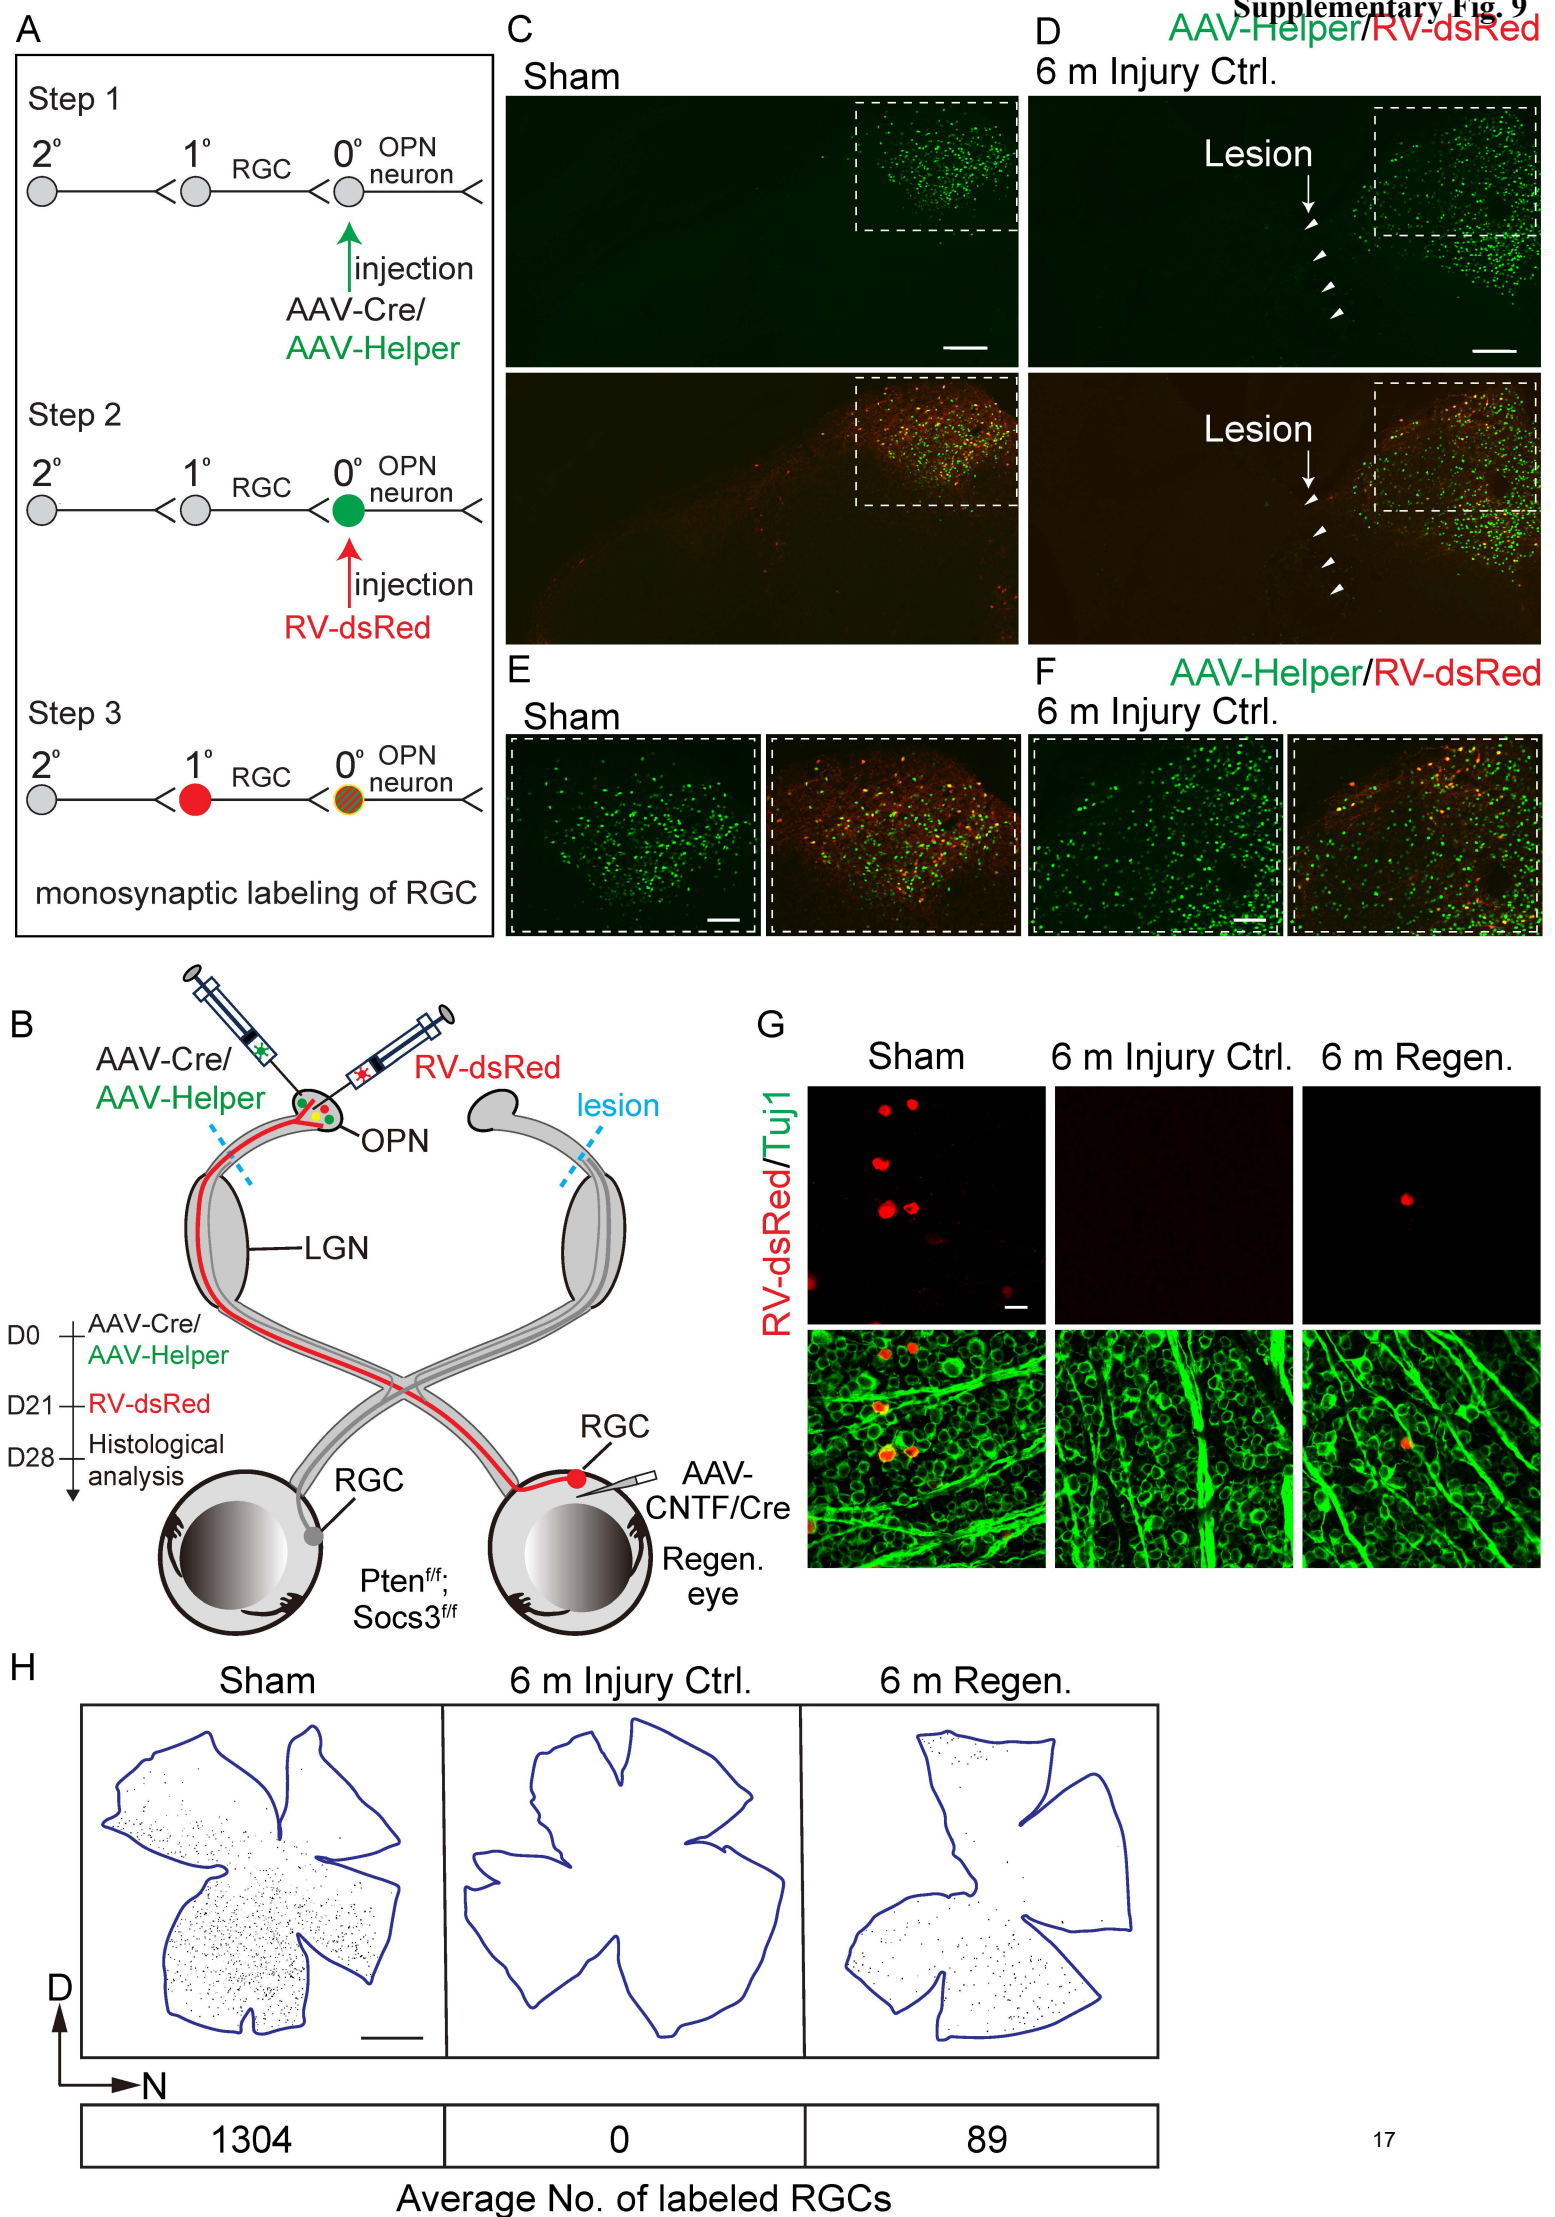

**Supplementary Fig. 9: Monosynaptic rabies virus tracing of synapses reestablishing RGCs.**

(A) A diagram illustrating the steps and labeling outcomes of retrograde monosynaptic tracing using the rabies virus. The injection of AAV-Cre and AAV-Helper (AAV-DIO-EGFP-TVA, AAV-DIO-RVG) results in the labeling of the 0<sup>0</sup> OPN neurons with GFP. Following this, the injection of RV-dsRed labels both the 0<sup>0</sup> OPN neurons and the 1<sup>0</sup> RGCs, which forms a monosynaptic connection with the 0<sup>0</sup> OPN neurons, with dsRed, while the 2<sup>0</sup> neurons remain unlabeled.

(B) A schematic representation illustrates rabies virus retrograde tracing from the OPN to the cell bodies of RGCs in the eye injected with AAV-CNTF/Cre. The rabies virus identifies RGCs whose regenerated axons successfully extended to the OPN and reformed synaptic connections.

(C-D) Fluorescence images depict the injection site in Sham (C) and 6 m Injury Ctrl. (D) mice. The helper viruses and AAV1-Syn-Cre were injected into the OPN of the mice (green). Three weeks after the helper virus injection, RV-EnvA-ΔG-dsRed (red) was injected into the OPN. The arrowhead indicates the lesion site in (D). Scale bar: 200 μm.

(E-F) Zoomed-in images of the areas indicated by rectangles in (C) and (D), showing the injection site in the OPN region. Scale bar: 100 μm.

(G) Fluorescence images display RV-dsRed-traced cells (red) co-localized with the RGC marker Tuj1 (green) in Sham and 6 m Regen. mice. Scale bar: 20 μm.

(H) Flat-mount retina images show RV-traced RGCs (black dots) across different groups. Scale bar: 1000 μm. The lower panel presents the average number of traced RGCs in each group. n=6 (Sham) or 3 (6 m Injury Ctrl. and 6 m Regen.) mice per group.

Source data are provided as a Source Data file.



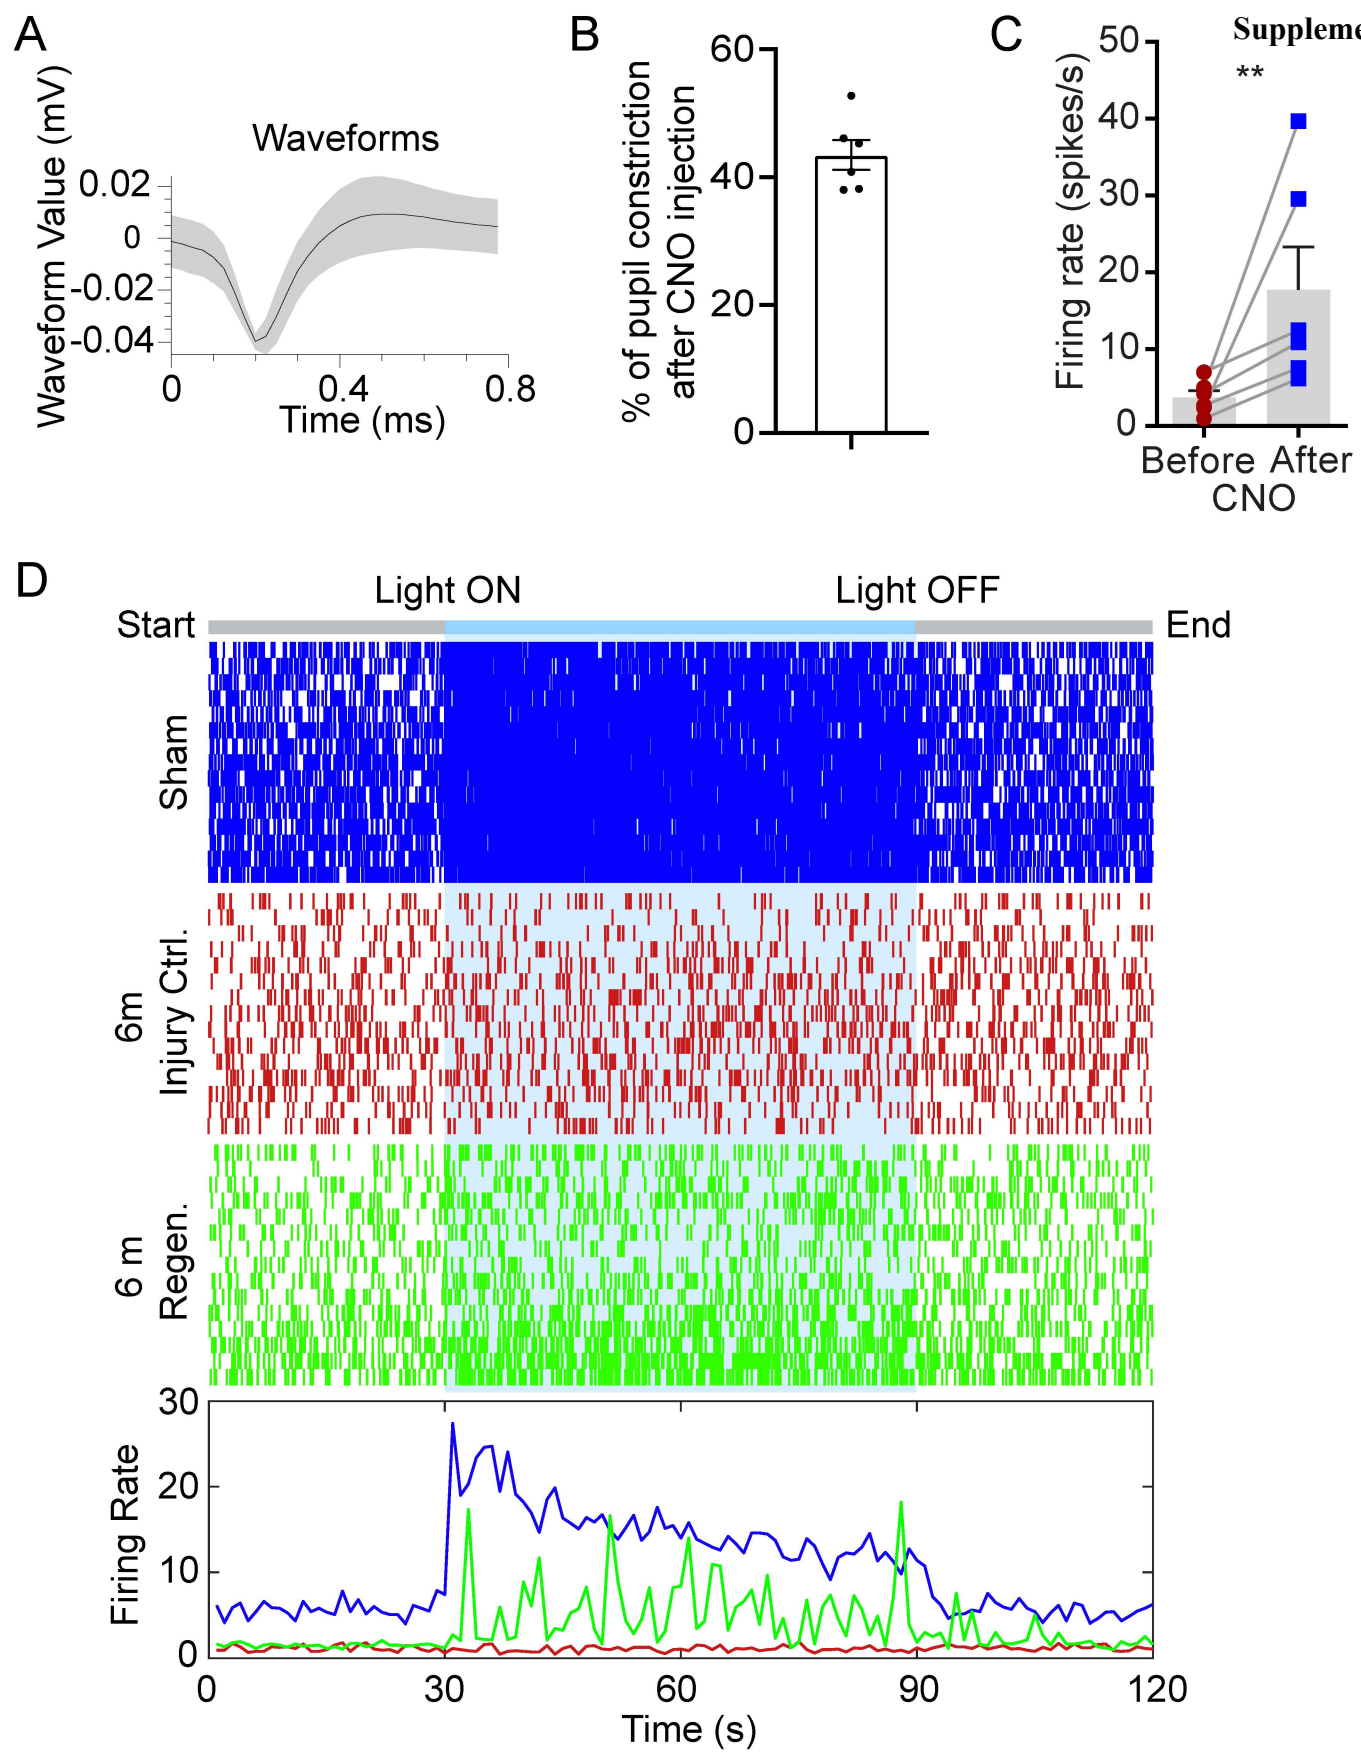

**Supplementary Fig. 10: Neural activity dynamics of the OPN neurons across different groups.**

(A) Schematic image showing the spike shape recorded in the OPN.

(B) Quantification of pupil constriction after 5 mg/kg CNO intraperitoneal injection. The mice received AAV-hSyn-DREADD-Gq injection into the OPN. The PLR test was performed in the dark. Data presents mean  $\pm$  SEM. n=6 mice.

(C) Quantification of the neuronal firing rate in the OPN before and after 5 mg/kg CNO treatment. The mice received AAV-hSyn-DREADD-Gq injection into the OPN. Data presents mean  $\pm$  SEM. n=6 mice. Statistical significance:  $p=0.0046$ , Ratio paired t-test, two-sided.

(D) In-vivo electrophysiology recording of OPN neural signals and kinematics. The upper three panels show the raster plots of typical OPN neurons in response to 15 times of 60 s light-dark stimulation from Sham mice, 6 m Injury Ctrl. mice and 6 m Regen. mice. The light blue rectangle indicates the 60 s duration of light stimulation. The fourth panel shows the average firing rate across 15 trials among different groups.

**\*\*  $p \leq 0.01$**

Source data are provided as a Source Data file.



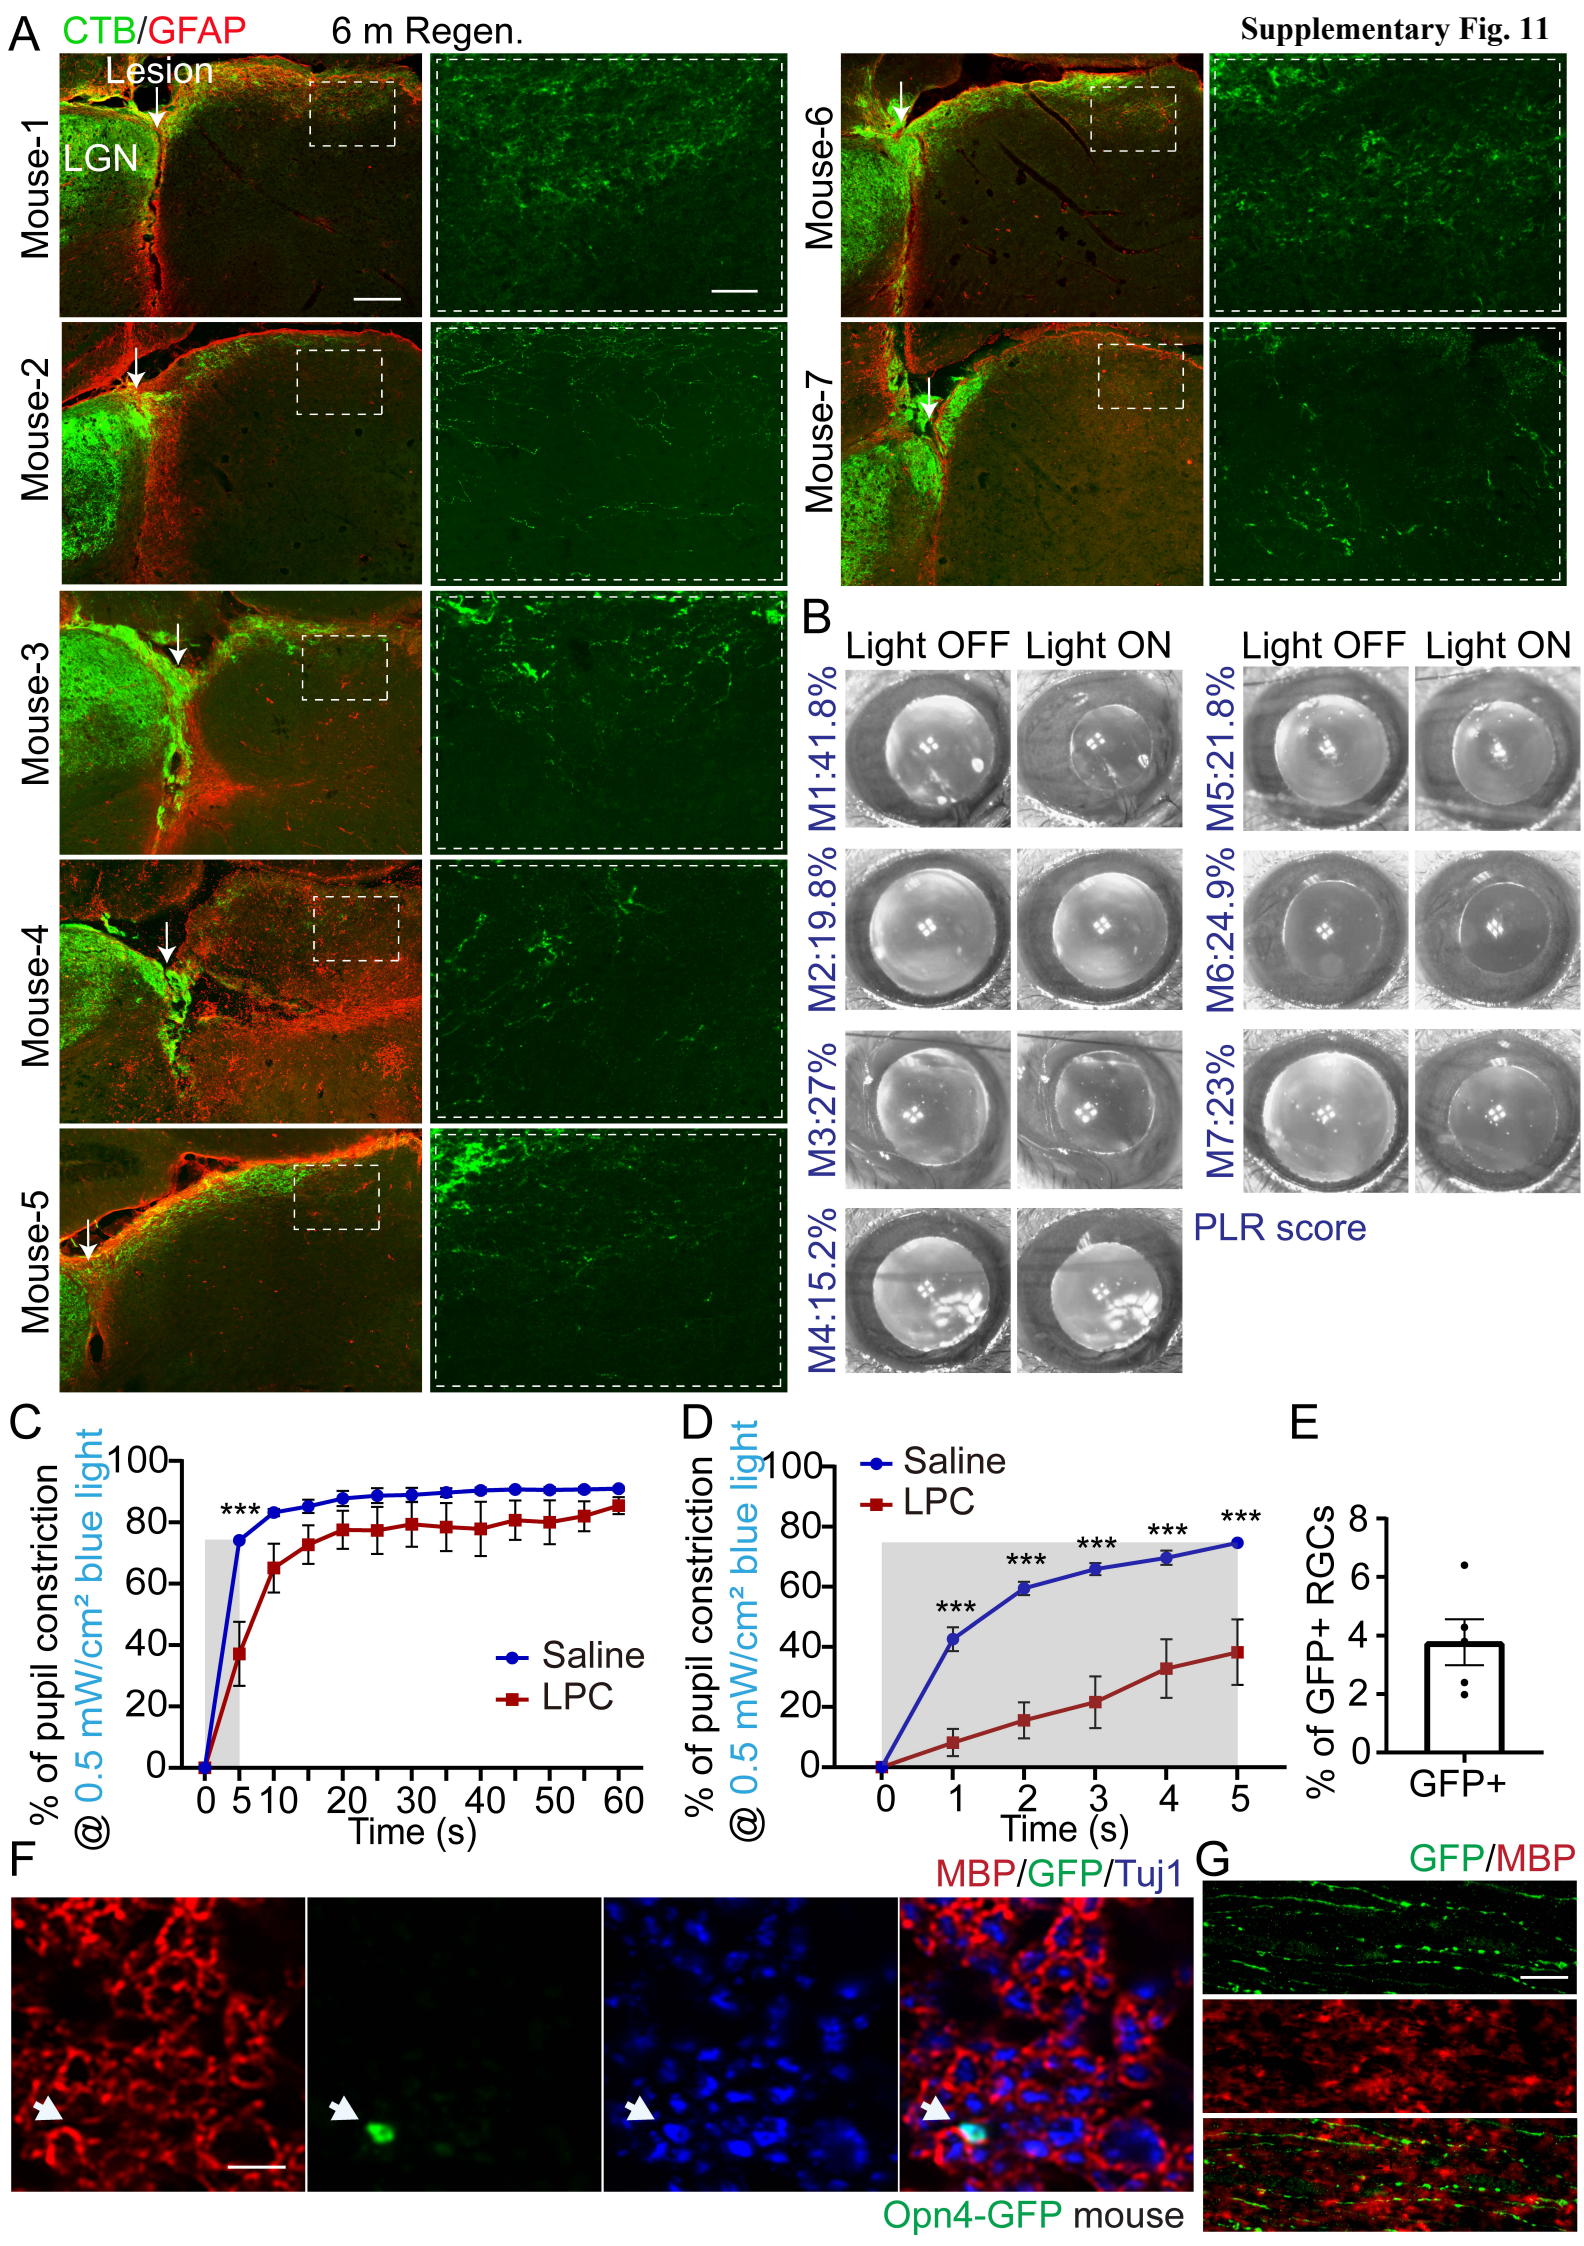

**Supplementary Fig. 11: Axon regeneration and PLR recovery in individual Pten/Socs3 knockout mice 6 months after pre-OPN OTI and optic tract demyelination impairs PLR.**

(A) Representative images (left) showing CTB-labeled regenerated axons (green) 6 months after pre-OPN OTI in individual Pten/Socs3 knockout and CNTF expression mice. The lesion site was indicated by GFAP staining (red). Scale bar: 200 $\mu$ m.

Zoomed-in images (right) within the dashed rectangles showing CTB traced axons in the OPN regions. Scale bar: 50 $\mu$ m.

(B) Representative pupil images from individual regeneration mice before and after 1-minute light (0.5 mW/cm<sup>2</sup>) stimulation. The PLR score indicates the percentage of pupil constriction. M1-M7 represents mouse1-mouse7 in (A).

(C) Quantification of the pupil constriction dynamics within 1 minute of light (0.5 mW/cm<sup>2</sup>) stimulation after saline or LPC optic tract injection. Data presents mean  $\pm$  SEM. n=5 mice. Statistical significance: p<0.0001 (5 s). ANOVA followed by Bonferroni test, two-sided.

(D) Quantification of pupil constriction dynamics within the first 5 sec in (C). Data presents mean  $\pm$  SEM. n=5 mice. Statistical significance: p=0.0004, 0.0002, 0.0002 (1 s, 4 s, 5 s), p<0.0001 (2 s, 3 s). ANOVA followed by Bonferroni test, two-sided.

(E) Quantification of the percentage of GFP+ RGCs in Opn4-GFP mice.

(F-G) Cross sections (F) and longitude sections (G) of optic nerve from intact Opn4-GFP mice showing co-staining of GFP (green) and myelin marker MBP (red). The arrow indicates that the GFP labeled ipRGC axon was unmyelinated in the cross section (F). Tuj1 (blue) was used for staining the axons in nerves (F). Scale bar: 5  $\mu$ m (F), 20  $\mu$ m (G).

\*\*\* p $\leq$ 0.001

Source data are provided as a Source Data file.



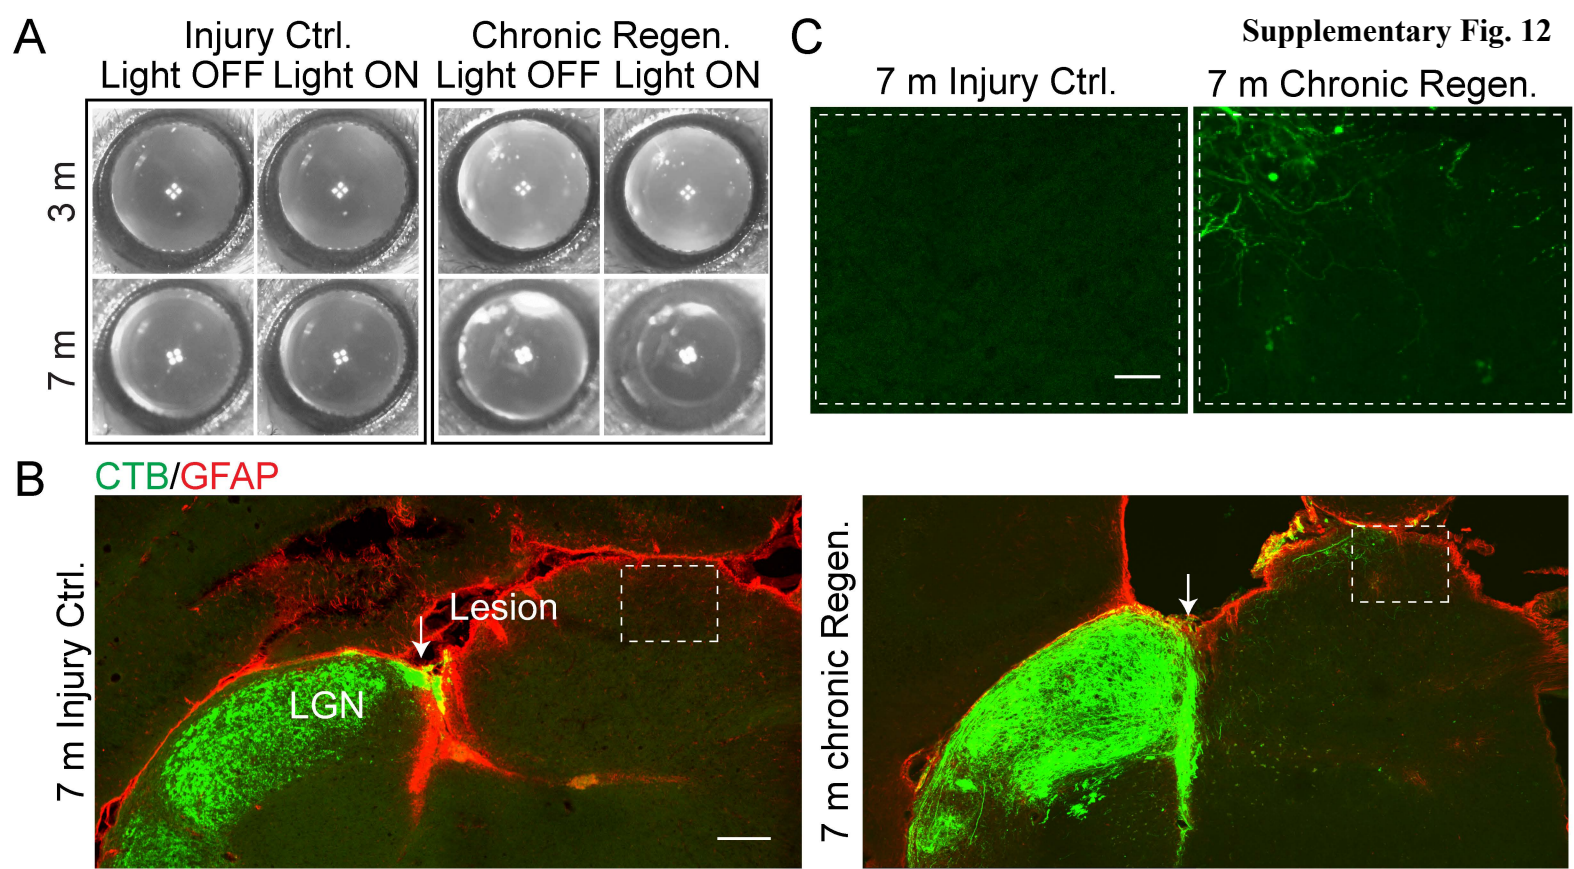

**Supplementary Fig. 12: PSCL manipulation promotes axon regeneration and PLR recovery in chronic pre-OPN lesion model.**

(A) Representative pupil images from the mice with chronic pre-OPN OTI before and after 1-minute light ( $0.5 \text{ mW/cm}^2$ ) stimulation. The chronic Regen. group displayed a partial PLR recovery 7 months post-injury.

(B) Representative images showing a lack of CTB-labeled RGC axon (green) regeneration in Injury Ctrl. mice undergoing a chronic pre-OPN OTI, while PSCL manipulation in  $\text{Pten}^{\text{f/f}};\text{Socs3}^{\text{f/f}}$  mice promotes axonal regrowth into OPN 7 months after chronic pre-OPN OTI. The lesion site was indicated by GFAP (red) staining. Scale bar:  $200 \mu\text{m}$ .

(C) Zoomed-in images of the dashed rectangles in (B) display the OPN regions. Scale bar:  $50 \mu\text{m}$ .



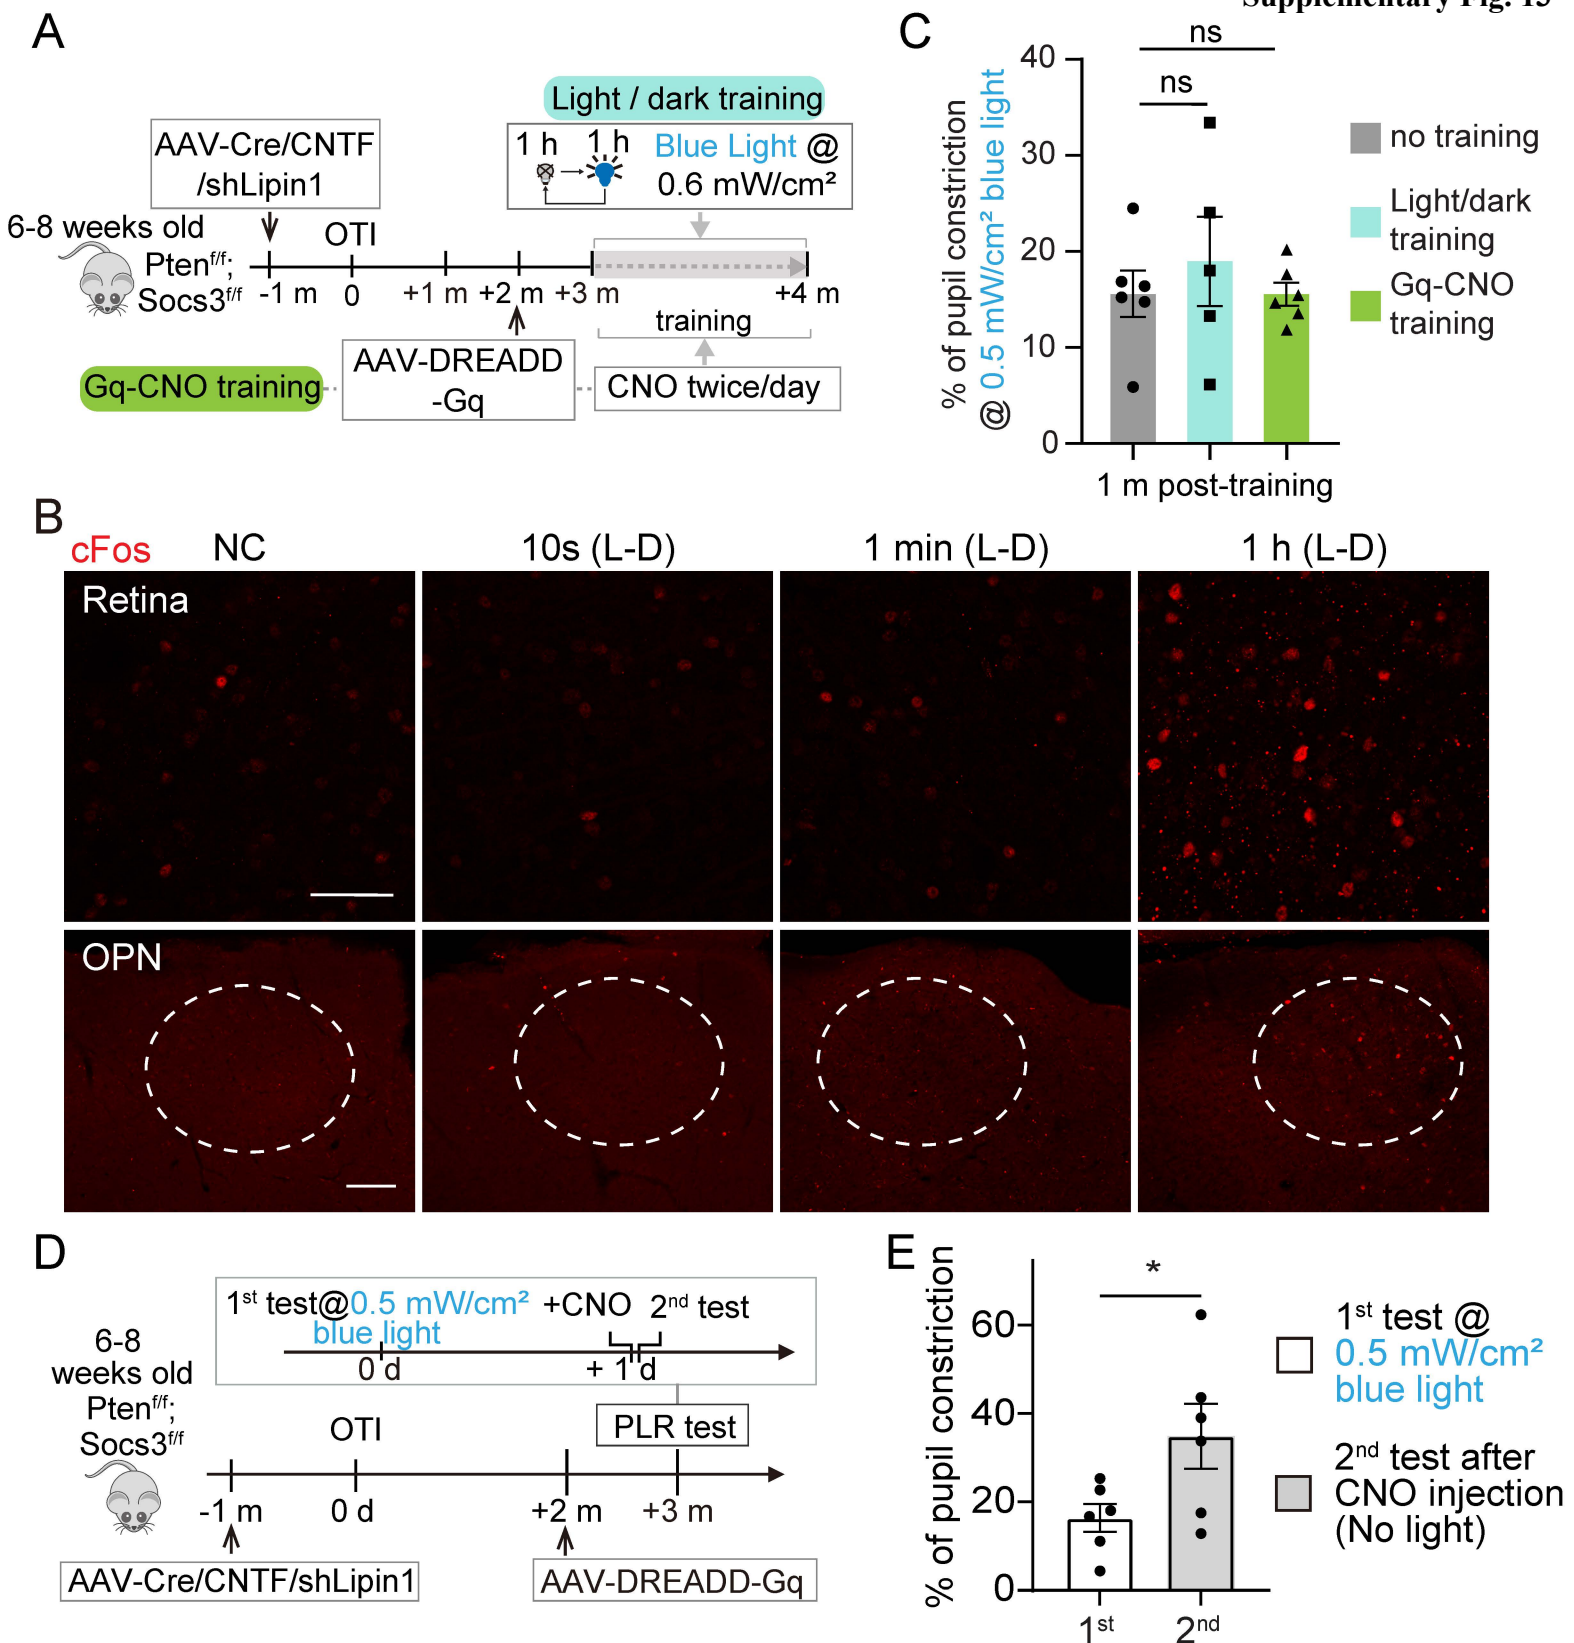

**Supplementary Fig. 13: Light/dark training and DREADD-Gq training fail to improve the recovery of PLR.**

(A) Schematic diagram showing the experimental design for 1-month neuronal modulation training starting from 3 months after injury in PSCL Regen. mice. The Light/dark training subjected mice to alternating cycles of 1-hour blue light (0.6 mW/cm<sup>2</sup>) and 1 hour darkness. For Gq-CNO training, mice received AAV-DREADD-Gq intravitreal injection 2 months after injury, followed by bi-daily intraperitoneal injections of 5 mg/kg CNO starting at 3 months post-injury. PLR was assessed after completing the 1-month training.

(B) Representative images showing the cFos expression after different paradigms (Normal circadian (NC), 10 seconds, 1 minute, or 1 hour sustained light-dark cycle) of light stimulation in the retina (upper panel) and OPN (lower panel). Scale bar: 50  $\mu$ m (upper panel), 100  $\mu$ m (lower panel).

(C) Quantification of percentages of pupil constrictions following 1 minute of 0.5 mW/cm<sup>2</sup> light stimulation after training in different groups. Data presents mean  $\pm$  SEM. n=5 (Light/dark training) and n=6 (no training and Gq-CNO training) mice per group. Statistical significance: p=0.6378 (no training vs. Light/dark training), p>0.999 (no training vs. Gq-CNO training). ANOVA followed by Dunnett's test, two-sided.

(D) Schematic diagram illustrating the experimental design for (E). PSCL Regen. mice received AAV-DREADD-Gq intravitreal injection 2 months post-injury. 1 month later, mice underwent the 1<sup>st</sup> PLR test with 0.5 mW/cm<sup>2</sup> blue light stimulation. 1 day later, in the absence of light stimulation, the 2<sup>nd</sup> PLR test was performed following one 5 mg/kg CNO intraperitoneal injection.

(E) Quantification of percentages of pupil constrictions during the 1<sup>st</sup> or 2<sup>nd</sup> PLR test. Data presents mean  $\pm$  SEM. n=6 mice. Statistical significance: p=0.0339, student's t-test, two-sided.

ns, not significant p>0.05, \* p $\leq$ 0.05

Source data are provided as a Source Data file.

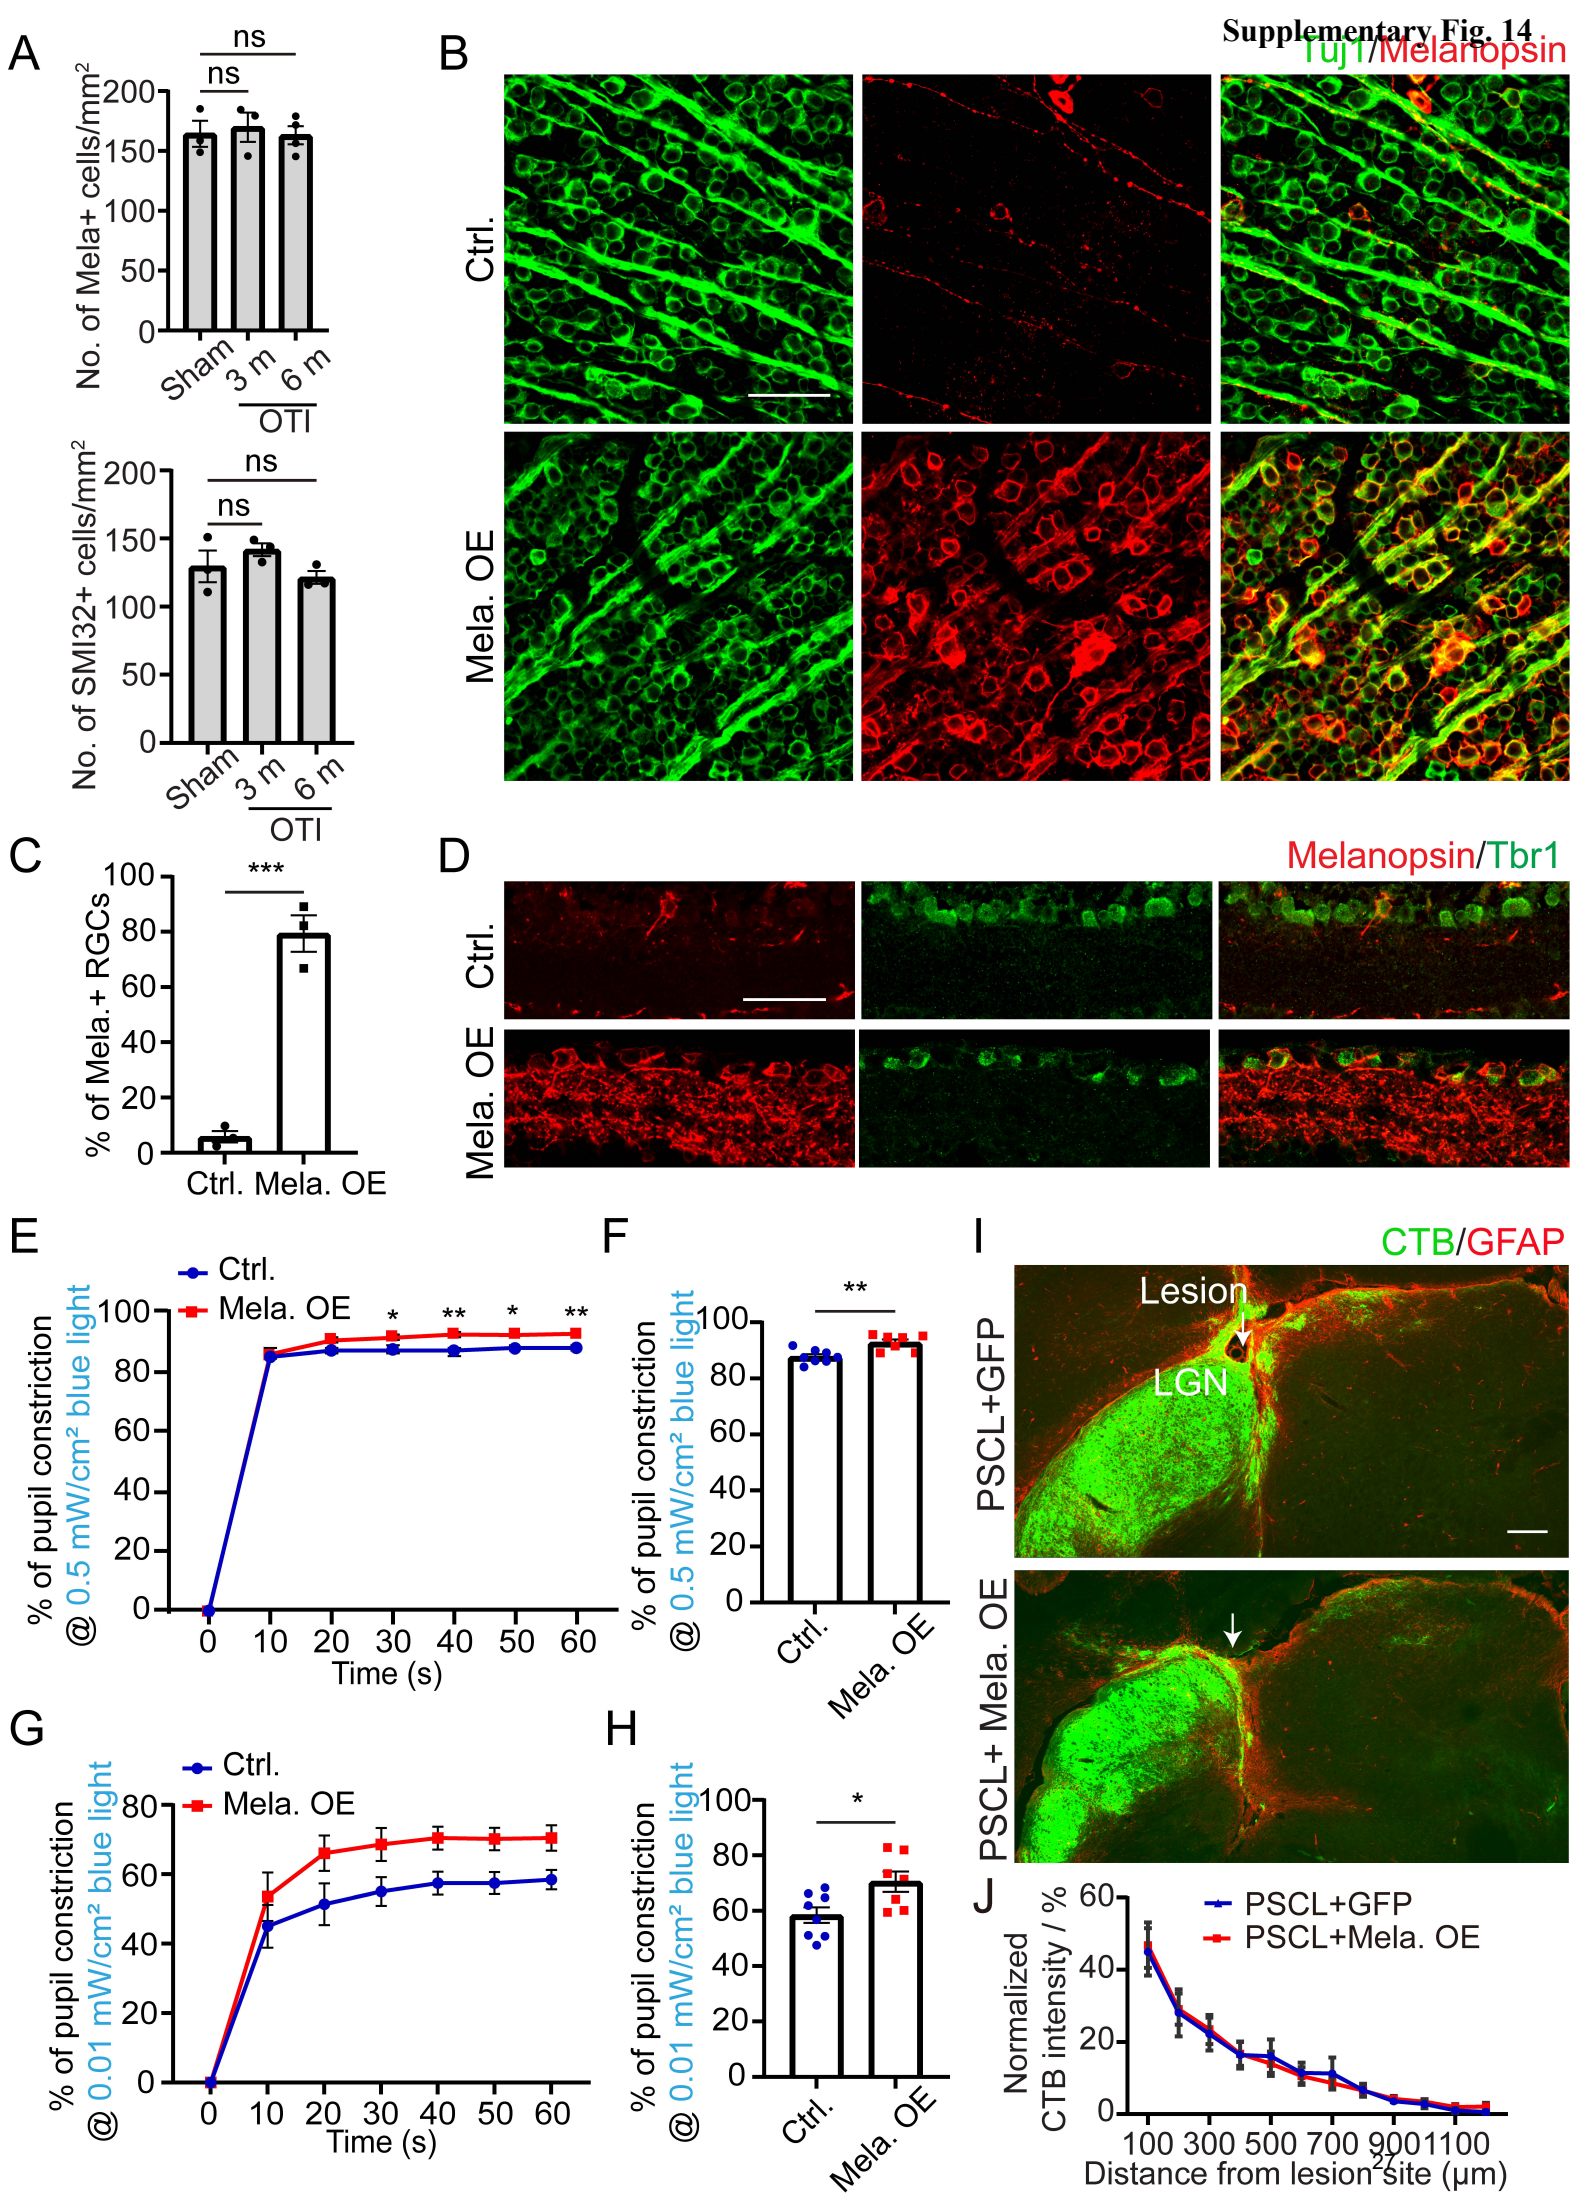



**Supplementary Fig. 14: Overexpression of melanopsin enhances PLR in intact mice and does not further promote axon regeneration induced by PSCL manipulation after OTI.**

(A) Quantification of surviving ipRGCs labeled with Melanopsin (upper panel) and SMI32 (lower panel). Data presents mean  $\pm$  SEM. For melanopsin labeling group: n=3 (Sham), 3 (3 m OTI), and 4 (6 m OTI) mice. Statistical significance: p=0.9003 (sham vs. 3 m OTI), 0.9949 (sham vs. 6 m OTI). For SMI32 labeling group: n=3 each group. Statistical significance: p=0.4755 (sham vs. 3 m OTI), 0.6965 (sham vs. 6 m OTI), ANOVA followed by Dunnett test, two-sided.

(B) Flat mount retina images showing the Tuj1 (green) and melanopsin (red) staining in Ctrl. and Mela. OE group. Scale bar: 50  $\mu$ m.

(C) Quantification of the percentage of melanopsin+ RGCs in Ctrl. and Mela. OE groups. Data presents mean  $\pm$  SEM. n=3 mice. Statistical significance: p=0.0004, student's t-test, two-sided.

(D) Representative images showing the melanopsin (red) and Tbr1 (green) staining. Scale bar: 50  $\mu$ m.

(E-H) Quantification of pupil constriction dynamics within 1 minute of light stimulation (E, G) and pupil constriction after 1 minute of light stimulation (F, H) in Ctrl. and Mela. OE groups at light intensities of 0.5 mW/cm<sup>2</sup> (E, F) and 0.01 mW/cm<sup>2</sup> (G, H). Data presents mean  $\pm$  SEM. n=8 (Ctrl.), n=7 (Mela. OE). Statistical analysis: p=0.0405, 0.0015, 0.0119, 0.0069 (E 30-60 s). No significant differences between the Ctrl. and Mela. OE groups at any time point in (G). ANOVA followed by Bonferroni test in (E) and (G); Statistical significance: p=0.0026 (F), p=0.0204 (H), student's t-test in (F) and (H), two-sided.

(I) Representative images of CTB-traced axons (green) 3 months after pre-OPN OTI with lesion sites indicated by GFAP (red) staining. Scale bar: 200  $\mu$ m.

(J) Quantification of the percentage of normalized CTB intensity at different distances from the lesion site. No significant difference exists between the two groups. Data presents mean  $\pm$  SEM. n=12 mice, ANOVA followed by Bonferroni test, two-sided.

ns, not significant p>0.05, \* p $\leq$ 0.05, \*\* p $\leq$ 0.01, \*\*\* p $\leq$ 0.001

Source data are provided as a Source Data file.

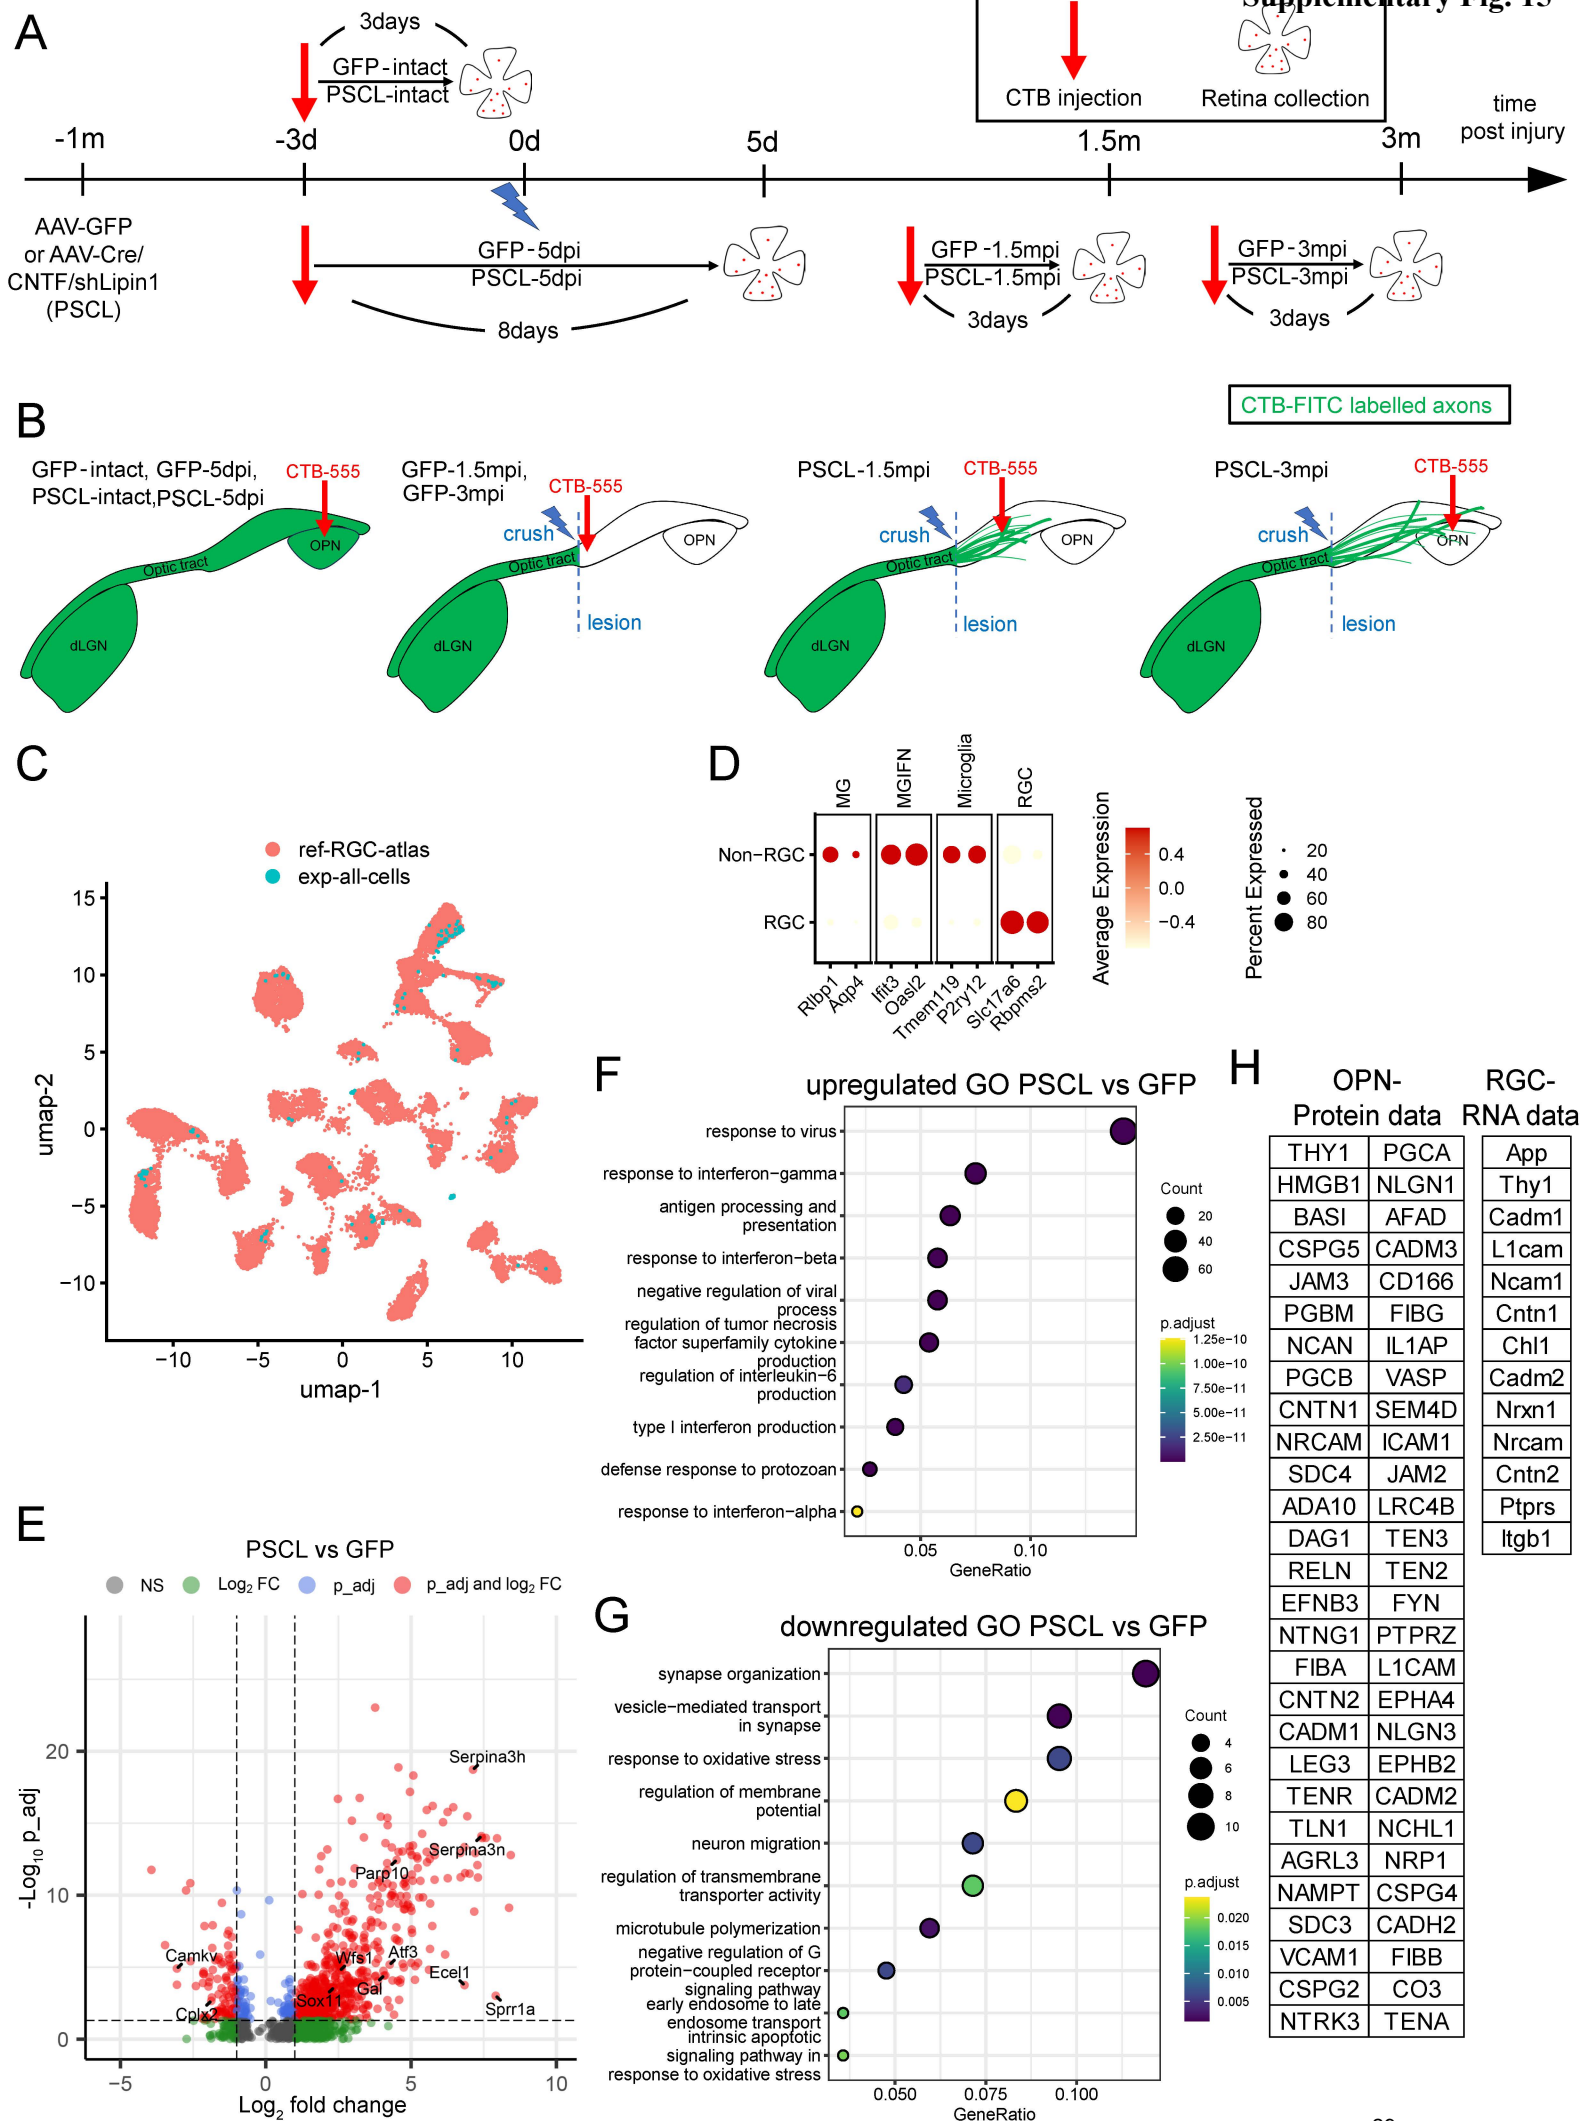



**Supplementary Fig. 15: Sequential labeling and marker expression analysis in single-cell RNA sequencing and axon guidance-related molecules identified in proteomics.**

(A, B) Illustration of timeline for experimental design in single-cell RNA-seq, encompassing the tracing process, injury, and RGC collection. CTB-555 was injected into different positions to label targeted RGCs.

(C) Umap plot showing the integration result of cells collected in this study and a referenced RGC atlas <sup>53</sup> using the FIRM algorithm <sup>96</sup>.

(D) Dot plot showing the expression of selected cell-type marker expression of filtered RGCs and non-RGCs. Noticed that filtered RGCs showed high expression for RGC marker genes while non-RGCs showed high expression for glia marker genes.

(E) Volcano plot displaying the differentially expressed genes between the PSCL group and the Injury Ctrl. group. Genes denoted by red dots exhibit a significant change in expression, as determined by a log2 fold change  $> 1$  or  $< -1$ , and an adjusted p-value  $< 0.05$ .

(F, G) Dot plots illustrating the enriched Gene Ontology (GO) terms associated with the upregulated (panel F) and downregulated (panel G) genes, respectively, in the PSCL vs. GFP comparison, highlighting the biological processes that are differentially regulated between these two groups.

(H) Listing the potential ligand-receptor pairs mediating the reinnervation of OPN by regenerated axons based on the paired expression of RNA in RGCs and protein in OPN region.

Source data are provided as a Source Data file.
